# Supplementary material for: Genes and Gene Networks Involved in Sodium Fluoride-Elicited Cell Death Accompanying Endoplasmic Reticulum Stress in Oral Epithelial Cells
Source: MDPI journal article supplement (doi:10.3390/ijms15058959), 2014-05-20
Supplement: s1 [file s1]

## Sheet: Table S1
Supplementary data Table S1
List of genes of cluster Up-I.
Probe Set ID	Gene Symbol	Expression levels (log2)							Gene Title
		Control	NaF (0 mM)			NaF (2 mM)
			3 h	6 h	12 h	3 h	6 h	12 h
1367741_at	Herpud1	-0.17	-0.07	0	-0.21	0.08	1.12	2.9	homocysteine-inducible, endoplasmic reticulum stress-inducible, ubiquitin-like domain member 1
1367795_at	Ifrd1	-0.12	0	-0.09	-0.14	1.4	1.98	1.48	interferon-related developmental regulator 1
1368090_at	Prx	0	-0.62	-0.19	-1.7	0.95	1.51	1.8	periaxin
1368124_at	Dusp5	-0.06	0	-0.36	-0.42	0.79	1.77	1.95	dual specificity phosphatase 5
1368146_at	Dusp1	-0.18	0	-0.45	-0.24	2.3	2.38	1.25	dual specificity phosphatase 1
1368321_at	Egr1	-0.61	0	-0.38	-0.22	1.98	1.43	0.41	early growth response 1
1368359_a_at	Vgf	-2.26	0	-2.68	-2.52	0.41	1.97	2.68	VGF nerve growth factor inducible
1368489_at	Fosl1	-0.16	0	-0.27	-0.47	0.94	1.49	1.31	fos-like antigen 1
1368713_at	Mmp10	-1.24	-0.23	-0.16	0	0.78	2.49	3.17	matrix metallopeptidase 10
1368760_at	Cxcl2	0	0.23	-1.02	-1.62	-0.42	1.51	2.39	chemokine (C-X-C motif) ligand 2
1368983_at	Hbegf	-0.48	0	-0.67	-0.47	0.83	1.7	1.17	heparin-binding EGF-like growth factor
1369007_at	Nr4a2	0	-0.29	-0.24	-0.24	0.67	1.34	2.45	nuclear receptor subfamily 4, group A, member 2
1369067_at	Nr4a3	0	-0.59	-0.88	-0.78	2.31	3.86	3.53	nuclear receptor subfamily 4, group A, member 3
1369161_at	Abcb4	0	-0.85	-1.03	-1.35	0.24	2.46	1.42	ATP-binding cassette, sub-family B (MDR/TAP), member 4
1369191_at	Il6	0	-0.57	-0.97	-1.01	1.21	2.46	4.64	interleukin 6
1369268_at	Atf3	-0.22	0	-0.81	-0.77	3.18	2.97	1.87	activating transcription factor 3
1369590_a_at	Ddit3	-0.2	-0.14	0	-0.24	1.88	2.84	3.08	DNA-damage inducible transcript 3
1369728_at	LOC680097	-0.55	-0.43	0	-1.21	0.73	2.09	2.69	similar to germinal histone H4 gene
1369871_at	Areg	-0.19	0	-0.31	-0.41	0.94	1.74	1.18	amphiregulin
1370081_a_at	Vegfa	0	-0.15	-0.28	-0.87	0.63	1.77	1.87	vascular endothelial growth factor A
1370153_at	Gdf15	0	-0.3	-0.06	-0.54	0.08	2.07	2.01	growth differentiation factor 15
1370174_at	Ppp1r15a	0	-0.01	-0.08	-0.04	1.82	2.47	2.67	protein phosphatase 1, regulatory (inhibitor) subunit 15A
1370177_at	PVR	-0.14	0	-0.21	-0.25	0.85	1.52	1.33	poliovirus receptor
1370650_s_at	Bdkrb2	0	-0.51	-1.76	-0.88	1.27	2.62	1.95	bradykinin receptor B2
1370694_at	Trib3	0	-0.04	-0.01	-0.26	1.31	1.6	3.49	tribbles homolog 3 (Drosophila)
1370695_s_at	Trib3	0	-0.17	-0.51	-0.39	0.22	1.19	3.38	tribbles homolog 3 (Drosophila)
1370988_at		-0.09	-0.37	0	-0.05	0.32	1.69	2.36
1371040_at	Slc1a5	-0.11	-0.21	0	-0.62	0.99	1.48	2.18	solute carrier family 1 (neutral amino acid transporter), member 5
1371170_a_at	Il1a	0.26	-0.63	-0.53	-0.5	0	1.56	1.81	interleukin 1 alpha
1371629_at	Cxxc5	-0.15	-0.5	0	-0.15	0.82	2.59	2.88	CXXC finger 5
1371754_at	Slc25a25	-0.31	0	-0.67	-0.63	1.46	1.25	0.44	solute carrier family 25 (mitochondrial carrier, phosphate carrier), member 25
1372389_at	Ier2	-0.21	0	-0.49	-0.4	1.81	1.36	0.6	immediate early response 2
1372726_at	Hist1h4b	-0.33	-0.26	-0.17	0	1.2	2	1.94	histone cluster 1, H4b
1372729_at	Procr	0	-0.18	-0.13	-0.38	0.46	1.41	1.85	protein C receptor, endothelial
1373093_at	Errfi1	-0.06	0	-0.25	-0.25	1.52	2.02	1.95	ERBB receptor feedback inhibitor 1
1373177_x_at	LOC100360189 /// LOC363363 /// LOC501476 /// LOC680682 /// LOC685369 /// LOC689362 /// LOC691793	-0.17	-0.11	0	-0.33	1.01	1.57	0.82	rCG56785-like /// hypothetical LOC363363
1373223_at	Fam171b	-0.6	0	-0.03	-1.07	0.49	2.38	3.23	family with sequence similarity 171, member B
1373403_at	LOC684871	-0.12	0	-0.46	-0.12	1.35	1.66	1.72	similar to Protein C8orf4 (Thyroid cancer protein 1) (TC-1)
1373590_at	Stom	-0.27	0	-0.14	-0.2	0.56	1.31	1.84	stomatin
1373759_at		0	-0.28	-0.38	-0.56	3.29	2.27	0.02
1373767_at	Zfand2a	-0.02	0	-0.23	-0.41	0.65	1.2	1.6	zinc finger, AN1-type domain 2A
1373807_at	Vegfa	-0.05	0	-0.44	-0.24	0.99	1.68	2.43	vascular endothelial growth factor A
1373866_at	Coq10b	-0.01	0	-0.18	-0.1	0.7	1.43	1.5	coenzyme Q10 homolog B (S. cerevisiae)
1373989_at	Rassf1	0	-0.04	-0.02	-0.2	1.16	1.34	1	Ras association (RalGDS/AF-6) domain family member 1
1374143_at	Epha2	-0.25	0	-0.49	-0.63	0.62	1.29	1.33	Eph receptor A2
1374204_at	Wsb1	-0.05	0	-0.33	-0.09	1.03	1.27	1.05	WD repeat and SOCS box-containing 1
1374280_at	Cbln2	-0.5	-0.97	0	-1.52	0.18	3.15	5.33	cerebellin 2 precursor
1374600_at	Hist1h4b	-0.25	0	-0.17	-0.1	0.65	1.51	1.63	histone cluster 1, H4b
1374610_at		0	-0.06	-0.44	-0.2	0.61	1.41	1.31
1374650_at	Nedd9	-0.05	0	-0.27	-0.31	0.64	1.39	1.5	neural precursor cell expressed, developmentally down-regulated 9
1374666_at		-0.11	-0.13	-0.09	0	1.22	1.37	1.06
1374832_at		-0.13	-0.45	0	-0.64	2.05	2.53	1.89
1375043_at	Fos	-0.17	0	-0.35	-0.06	4.17	2.8	1.56	FBJ osteosarcoma oncogene
1375475_at		0	-0.57	-0.9	-0.56	0.68	1.29	1.43
1376098_a_at		0	-0.29	-0.37	-0.62	0.79	1.83	2.49
1376178_at		-0.08	-0.27	-0.16	0	0.56	1.53	1.82
1376737_at		0	-0.22	-0.11	-0.04	0.99	1.19	1.72
1376845_at	Ifi27l2b	-0.23	0.03	-0.49	-0.17	0	1.24	3.01	interferon, alpha-inducible protein 27 like 2B
1376935_at		-0.39	-0.04	0	-0.16	2.23	2.77	2.78
1377019_at		-0.43	0	0	-0.28	1.98	2.87	2.25
1377461_at		-0.27	0	-0.42	-0.11	1.57	2.1	3.17
1382339_a_at		-0.89	-0.11	-0.25	0	1.59	2.68	2.14
1386321_s_at	Trib3	-0.27	-0.18	-0.04	0	1.33	1.81	3.44	tribbles homolog 3 (Drosophila)
1386935_at	Nr4a1	-0.14	-0.04	0	-0.64	1.76	1.63	0.58	nuclear receptor subfamily 4, group A, member 1
1387202_at	Icam1	-0.29	0	-0.22	-0.56	0.9	1.42	0.87	intercellular adhesion molecule 1
1387221_at	Gch1	0	-0.52	-0.23	-0.98	0.38	1.48	1.24	GTP cyclohydrolase 1
1387269_s_at	Plaur	0	-0.33	-0.54	-0.35	0.81	1.62	1.48	plasminogen activator, urokinase receptor
1387280_a_at	Slc7a5	-0.37	0	-0.24	-0.31	0.64	1.01	2.11	solute carrier family 7 (cationic amino acid transporter, y+ system), member 5
1387306_a_at	Egr2	-0.6	0	-0.28	-0.52	4.29	3.11	0.57	early growth response 2
1387442_at	Egr4	-0.53	0	0.12	-0.1	3	1.77	-0.38	early growth response 4
1387870_at	Zfp36	0	-0.04	-0.14	-0.02	1.91	1.82	0.8	zinc finger protein 36
1388686_at	Rcan1	0	-0.13	-0.27	-0.1	1.24	2.52	3.47	regulator of calcineurin 1
1388900_at		-0.07	-0.25	-0.17	0	0.68	1.39	1.87
1389402_at	Csrnp1	-0.34	0	-0.24	-0.41	2.43	3.22	2.7	cysteine-serine-rich nuclear protein 1
1389439_at		0	-0.15	-0.25	-0.29	0.82	1.41	2.38
1389474_at	Mylip	-0.11	-0.01	0	-0.3	1.58	2.5	2.31	myosin regulatory light chain interacting protein
1389573_at	Chac1	-0.13	-0.03	0	-0.04	0.68	1.52	3.05	ChaC, cation transport regulator homolog 1 (E. coli)
1389990_at		-0.11	-0.3	0	-0.09	0.22	1.87	2.45
1390109_at		-0.1	-0.17	0	-0.13	0.77	1.14	1.94
1390361_at	Znf213	-0.11	-0.33	0	-0.48	1.12	1.3	1.38	zinc finger protein 213
1390458_at	LOC100362458	-0.34	-0.22	0	-0.03	1.02	2.11	1.66	rCG23949-like
1390460_at		-0.25	-0.64	0	-0.26	0.78	1.65	1.96
1391384_at	Tnf	-0.8	0	-0.82	-0.86	2.3	3.1	1.9	tumor necrosis factor (TNF superfamily, member 2)
1392476_at	RGD1562378	-1.2	-0.35	-0.16	0	1.28	1.34	1.96	histone H4 variant H4-v.1
1392623_at		-0.16	-0.32	0	-0.06	1.59	2.1	2.21
1377860_at	Ttc39b	0	-0.11	-0.41	-0.16	0.28	1.83	1.93	tetratricopeptide repeat domain 39B
1377869_at	Ccrn4l	-0.17	0	-0.48	-0.66	1.75	2.1	1.66	CCR4 carbon catabolite repression 4-like (S. cerevisiae)
1378499_at		-0.82	-0.79	-0.61	0	1.64	1.55	0.93
1378608_at		-0.15	-0.44	0	-0.19	1.56	1.76	0.55
1378867_at		0	-0.15	-0.09	-0.36	1.17	1.6	1.93
1379477_at		-0.25	0	-0.13	-0.25	0.78	1.24	1.44
1380888_at	LOC684841	-0.65	-0.25	-0.28	0	0.69	1.57	2.3	similar to CG31613-PA
1380941_at		0	-1.13	-0.61	-0.29	1.55	3.1	2.73
1381070_at	Tslp	-0.12	-0.61	-0.1	0	0.73	2.25	3.37	thymic stromal lymphopoietin
1381208_at	Hist3h2a	-0.17	-0.4	-0.48	0	1.76	2.54	3.09	histone cluster 3, H2a
1381278_at		-0.16	-0.7	-0.5	0	0.47	1.48	1.6
1381335_at		-0.07	0	-0.19	-0.46	1.54	3.55	3.54
1382173_at		0	-0.21	-0.57	-0.18	0.69	1.45	2.22
1382225_at		0	-0.27	-0.77	-0.49	0.26	1.38	1.6
1382868_at		-0.36	0	-0.07	-0.06	0.56	1.59	1.32
1383608_at	Arrdc2	-0.23	-0.03	0	-0.55	1.84	1.22	0.43	arrestin domain containing 2
1383712_at		-0.02	0	-0.05	0	0.79	1.22	1.56
1383874_at		-0.33	0.05	-0.44	-0.54	0	1.4	2.13
1383938_at		-0.2	0	-0.11	-0.31	0.94	1.06	1.82
1384124_at		0	-0.29	-0.23	-0.22	1.02	1.31	1.46
1384162_at	Csrnp2	-0.13	0	-0.23	-0.24	0.99	1.29	0.9	cysteine-serine-rich nuclear protein 2
1384455_at	LOC100365921	0	-0.48	-0.63	-0.33	0.75	0.81	2.16	rCG31672-like
1385107_at	Slc6a14	0	-0.97	-0.83	-0.88	0.2	1.59	3.11	solute carrier family 6 (neurotransmitter transporter), member 14
1385150_at		-0.34	0	-0.8	-0.74	0.36	1.95	1.27
1385308_at	Mogat1	-0.07	0	-1.08	-0.29	0.08	1.9	2.24	monoacylglycerol O-acyltransferase 1
1385341_at	Gsg1	0	-2.7	-3.06	-0.73	0.49	1.57	2.58	germ cell associated 1
1385595_at	Kin	-0.51	0	-0.36	-0.36	0.77	1.18	1.63	antigenic determinant of rec-A protein homolog (mouse)
1385827_at	Clcf1	-0.02	0	-1.03	-1.1	1.36	0.36	1.6	cardiotrophin-like cytokine factor 1
1391255_at	Zmynd15	-0.09	0	-0.22	-0.35	0.95	1.61	1.34	zinc finger, MYND-type containing 15
1391674_at		-0.45	-0.22	-0.12	0	2	2.44	1.23
1391766_at	Hs3st5	-0.21	-0.88	0	-0.48	0.35	1.9	3.12	heparan sulfate (glucosamine) 3-O-sulfotransferase 5
1391865_at	Rnf151	-0.78	-0.36	-0.11	0	1.28	2.07	1.85	ring finger protein 151
1392162_at	Pspc1	-0.49	0	-0.14	-0.07	0.37	1.71	1.36	Paraspeckle component 1
1392791_at		0.06	0	-0.29	-0.05	2.14	2.05	-0.31
1393073_at		-0.7	0	-0.16	-0.15	0.74	1.73	1.93
1393389_at	Nr4a3	-0.09	0	-0.32	-0.56	1.92	2.88	2.86	nuclear receptor subfamily 4, group A, member 3
1393668_at	Pex11g	-0.52	-0.43	0	-0.19	0.53	1.66	1.44	peroxisomal biogenesis factor 11 gamma
1393728_at		0	-0.35	-0.51	-0.88	0.91	1.86	1.78
1394779_at		-0.03	-0.44	0	-0.27	1.24	1.49	1.33
1395008_at	Itsn1	0	-0.34	-0.48	-0.62	1.27	2.43	2.87	intersectin 1 (SH3 domain protein)
1395043_at		-2.76	-0.59	0	-1.97	1.14	2.8	2.48
1395081_at		-0.57	-0.12	0	-0.21	0.85	1.31	2.34
1396053_at	Nedd9	0	-0.07	-0.12	-0.24	0.52	1.7	1.77	neural precursor cell expressed, developmentally down-regulated 9
1396194_at		-0.09	-0.08	0	-0.3	2.19	3.14	3.61
1397356_at	Arhgap1	-0.39	0	-0.18	-0.09	0.78	1.45	1.51	Rho GTPase activating protein 1
1397564_at		-0.4	-0.4	-0.45	0	1.39	2.6	2.99
1397719_at		0	-0.88	-0.2	-0.35	0.88	1.5	1.13
1397838_at		0	-0.78	-0.27	-0.1	0.97	1.51	1.36

## Sheet: Table S2
Supplementary data Table S2
List of genes of cluster Up-II.
Probe Set ID	Gene Symbol	Expression levels (log2)							Gene Title
		Control	NaF (0 mM)			NaF (2 mM)
			3 h	6 h	12 h	3 h	6 h	12 h
AFFX_rat_5S_rRNA_at		-1.11	0.02	-0.25	-0.33	0	0.93	0.41
1367616_at	Nppb	-0.2	0	-0.45	-0.53	0.34	1.21	1.1	natriuretic peptide precursor B
1367624_at	Atf4	0	-0.07	-0.13	-0.09	0.47	1.1	1.41	activating transcription factor 4 (tax-responsive enhancer element B67)
1367847_at	Nupr1	-0.31	-0.16	-0.02	0	0.15	0.41	1.02	nuclear protein, transcriptional regulator, 1
1367888_at	Pcdh21	-0.36	0	-0.3	-0.23	0.5	1.36	1.41	protocadherin 21
1367934_at	Rpl39	0.79	0	1.59	-0.07	-0.75	-0.07	2.19	ribosomal protein L39
1368144_at	Rgs2	0	0.03	-0.23	-0.38	-1.4	0.97	1.1	regulator of G-protein signaling 2
1368207_at	Fxyd5	0.14	0	-0.07	-0.17	0	0.77	1.57	FXYD domain-containing ion transport regulator 5
1368308_at	Myc	0.06	0.24	-0.22	-0.23	-1.91	0	0.82	myelocytomatosis oncogene
1368336_at	Fdx1	-0.08	0	0.01	0	-0.01	0.55	1.73	ferredoxin 1
1368482_at	Bcl2a1d	0.03	-0.86	-0.03	0	-0.27	0.32	1.55	B-cell leukemia/lymphoma 2 related protein A1d
1368494_at	S100a8	-0.18	0	0.03	-0.1	-0.34	0	1.65	S100 calcium binding protein A8
1368500_a_at	Rgs9	-0.2	-0.68	-0.11	0	0.64	1.07	1.4	regulator of G-protein signaling 9
1368545_at	Cflar	0.62	-0.03	-0.05	-0.21	0	0.53	2.4	CASP8 and FADD-like apoptosis regulator
1368662_at	Rnf39	-0.21	-0.22	-0.25	0	0.29	0.21	1.25	ring finger protein 39
1368896_at	Smad7	-0.24	-0.19	0.05	-0.47	1.52	1.23	0	SMAD family member 7
1369029_at	Plscr1	-0.18	-0.07	0	-0.21	0.34	1.13	2.2	phospholipid scramblase 1
1369083_at	Cirbp	-0.37	-0.78	-0.4	0	0.06	0.97	1.09	cold inducible RNA binding protein
1369472_a_at	Atf2	-0.11	-0.74	-0.37	0	0.6	1.08	1.32	activating transcription factor 2
1369529_at	Csf3	0	0.56	-0.13	-0.48	-0.37	0.7	1.38	colony stimulating factor 3 (granulocyte)
1369571_at	Golph3	0.07	-1.45	-0.14	0.03	-0.14	0	0.55	golgi phosphoprotein 3 (coat-protein)
1369587_at	Ereg	0.06	-0.43	-0.25	-0.27	0	1.02	1.68	epiregulin
1369610_at	Lin7c	-0.07	-0.24	-0.09	0	0.3	1.3	1.56	lin-7 homolog C (C. elegans)
1369628_at	Sv2b	-0.17	-0.51	-0.02	0	0.47	0.91	1.25	synaptic vesicle glycoprotein 2b
1369633_at	Cxcl12	-0.18	-0.2	-0.2	0	0.15	0.17	1.15	chemokine (C-X-C motif) ligand 12 (stromal cell-derived factor 1)
1369718_at	Ssr3	-0.51	-0.4	0	0.1	-0.08	0.49	0.96	signal sequence receptor, gamma
1369736_at	Emp1	0.24	-1.12	0	-0.08	-0.47	0.04	0.53	epithelial membrane protein 1
1369783_a_at	Nrg1	0	-0.09	-0.22	-0.23	0.7	0.9	1.46	neuregulin 1
1369814_at	Ccl20	0.56	0.77	-0.13	-0.49	-0.87	0	0.85	chemokine (C-C motif) ligand 20
1369989_at	Pnpo	0.14	0	-0.01	-0.16	-0.11	0.51	1.8	pyridoxine 5'-phosphate oxidase
1370007_at	Pdia4	-0.1	-0.08	0.11	0	-0.41	0.18	1.23	protein disulfide isomerase family A, member 4
1370163_at	Odc1	-0.16	0	-0.24	-0.35	0.58	1.16	1.22	ornithine decarboxylase 1
1370251_at	Avpi1	0	-0.24	-0.14	0.17	-0.06	0.54	1.44	arginine vasopressin-induced 1
1370283_at	Hspa5	-0.26	0	0.09	-0.25	0	0.5	1.23	heat shock protein 5
1370319_at	Ppif	-0.03	-0.21	-0.04	0	0.31	1.09	1.39	peptidylprolyl isomerase F
1370406_a_at	Cd55	-0.18	0	-0.05	-0.12	0.05	0.55	1.43	Cd55 molecule
1370435_a_at	Nudt6	-0.33	0	-0.07	0.22	-0.21	1.09	1.45	nudix (nucleoside diphosphate linked moiety X)-type motif 6
1370454_at	Homer1	-0.18	-0.2	0	-0.47	0.92	1.34	0.46	homer homolog 1 (Drosophila)
1370464_at	Abcb1a	-0.81	-0.88	0.03	-0.23	0	0.59	1.58	ATP-binding cassette, sub-family B (MDR/TAP), member 1A
1370465_at	Abcb1a	-0.02	-0.02	0	-0.2	0.38	0.84	1.5	ATP-binding cassette, sub-family B (MDR/TAP), member 1A
1370747_at	Fgf9	-0.71	-0.13	0.12	0	-0.2	1.1	2.28	fibroblast growth factor 9
1370913_at	Rsad2	0.34	-0.02	-0.65	-0.9	0	0.57	2.42	radical S-adenosyl methionine domain containing 2
1370986_s_at		0.72	-0.7	-0.36	-0.83	0.49	0.54	0
1371113_a_at	Tfrc	-0.13	-0.41	0.2	0	-0.06	0.58	1.39	transferrin receptor
1371211_a_at	Nrg1	0.01	-1.03	-0.65	-0.72	0	1.02	2.02	neuregulin 1
1371212_at	Nrg1	-0.5	0.07	-0.31	-0.45	0	1.19	2.3	neuregulin 1
1371261_at	Ptpn2	-0.36	-0.18	0.15	0.18	-0.12	0	1.02	protein tyrosine phosphatase, non-receptor type 2
1371286_at		0	-0.14	0.12	-0.36	-0.09	0.65	1.72
1371442_at	Hyou1	0	-0.11	-0.28	-0.03	0	0.16	1.63	hypoxia up-regulated 1
1371692_at	Mllt11	-0.05	-0.03	-0.09	0	0.71	1.17	1.48	myeloid/lymphoid or mixed-lineage leukemia (trithorax homolog, Drosophila); translocated to, 11
1371735_at		-0.01	0	-0.1	-0.01	0.47	1.03	1.81
1371765_at	Hist3h2a	-0.36	-0.47	-0.24	0	0.16	1.12	1.57	histone cluster 3, H2a
1371854_at		-0.04	0	-0.1	-0.15	0.57	1.11	1.44
1371959_at	Hist2h2aa3	-0.27	0	-0.12	0.37	-0.01	1.07	1.67	histone cluster 2, H2aa3
1371976_at	RGD1311273	-0.15	0.36	0	0.09	-0.12	-0.34	1.23	similar to RIKEN cDNA 9530058B02
1372117_at	Mtmr10	-0.11	0	-0.16	-0.35	0.34	0.91	2.5	myotubularin related protein 10
1372193_at	Impact	-0.42	0	-0.18	-0.07	0.19	0.55	1.1	imprinted and ancient
1372211_at	Mafk	-0.45	-0.21	-0.08	0	0.37	1.06	1.29	v-maf musculoaponeurotic fibrosarcoma oncogene homolog K (avian)
1372223_at		-0.2	-0.08	-0.06	0	0.6	1.26	1.38
1372352_at	Manf	-0.13	0	0.09	-0.07	-0.03	0.23	1.3	mesencephalic astrocyte-derived neurotrophic factor
1372602_at	Stbd1	-0.25	0	-0.46	-0.21	0.04	0.29	1.27	starch binding domain 1
1372717_at		-0.44	-0.15	0	-0.11	0.09	0.38	1.25
1372808_at	Mthfd2	0	-0.03	-0.07	-0.06	0.37	0.65	1.59	methylenetetrahydrofolate dehydrogenase (NADP+ dependent) 2, methenyltetrahydrofolate cyclohydrolase
1372812_at	Secisbp2l	-0.35	0.57	0	-0.32	-0.04	0.08	1.07	SECIS binding protein 2-like
1372885_at	Cebpg	-0.16	0.05	0	0.04	-0.06	-0.01	1.35	CCAAT/enhancer binding protein (C/EBP), gamma
1372966_at	Mfsd2	-0.37	-0.13	0	-1.03	0.58	0.51	1.5	major facilitator superfamily domain containing 2
1373043_at	Sdf2l1	-0.1	-0.09	0.09	-0.11	0	0.36	1.84	stromal cell-derived factor 2-like 1
1373045_at	Kctd13	0.01	-0.05	-0.42	-0.07	0	1.14	1.77	potassium channel tetramerisation domain containing 13
1373142_at		-0.15	0	-0.09	-0.16	0.12	0.43	1.2
1373282_at	LOC691431	-0.09	0	0.42	-0.01	-0.07	0.69	2.41	similar to mitochondrial carrier protein MGC4399
1373341_at	Fam53a	-0.25	0	-0.21	-0.06	0.16	0.17	1.07	family with sequence similarity 53, member A
1373373_at		-0.5	-0.11	0	-0.16	0.23	0.4	1.48
1373676_at		-0.32	-1.16	0.16	0	-0.04	0.05	1.16
1373685_at	Ankrd37	-0.07	-0.65	0.15	0	-0.72	0.86	2.36	ankyrin repeat domain 37
1373687_at	Sgsm3	-0.35	-0.21	0	0.06	-0.48	0.11	1.08	small G protein signaling modulator 3
1374028_at	LOC500974	-0.63	0	-0.54	-0.85	0.27	0.6	0.83	similar to CDNA sequence BC024479
1374034_at	Cars	-0.24	0	-0.07	-0.14	0.24	0.58	1.19	cysteinyl-tRNA synthetase
1374133_at	Trit1	-0.28	-0.11	-0.02	0	0.18	0.6	1.32	tRNA isopentenyltransferase 1
1374185_at	Txndc11	-0.26	0.07	0	-0.16	-0.72	0.04	1.31	thioredoxin domain containing 11
1374211_at	RGD1566084	-0.07	0.21	-0.17	-0.2	0.08	0	1.27	similar to Hypothetical protein LOC73072
1374399_at	Ehd4	-0.25	0.04	-0.05	0	-0.18	0.42	1.25	EH-domain containing 4
1374484_at	Tmem39a	-0.13	0	-0.11	-0.12	0.34	0.97	1.68	transmembrane protein 39a
1374500_at	Prpf38b	-0.29	-0.01	0	0	-0.11	0.2	1.18	PRP38 pre-mRNA processing factor 38 (yeast) domain containing B
1374543_at		0	-0.04	-0.08	-0.29	0.48	0.63	1.38
1374556_at	Smox	-0.18	-0.11	0	-0.23	0.39	1.39	1.52	spermine oxidase
1374566_at		-0.21	0	-1.13	-0.38	0.52	1.14	1.12
1374577_at	Tbrg4	0	-0.05	-0.1	-0.04	0.46	1.16	1.85	transforming growth factor beta regulator 4
1374632_at	Jmjd6	-0.23	0.01	-0.05	-0.04	0	0.25	1.16	jumonji domain containing 6
1374855_at	Per1	-0.13	0	-0.13	-0.08	0	0.11	1.46	period homolog 1 (Drosophila)
1374940_at	Usp36	-0.45	-0.13	0.01	-0.05	0.03	0	0.93	ubiquitin specific peptidase 36
1374947_at	Bcar3	-0.01	0	-0.2	0	0.72	0.7	1.35	breast cancer anti-estrogen resistance 3
1374991_at	Ydjc	0	0	-0.13	-0.21	-0.1	0.24	1.36	YdjC homolog (bacterial)
1375036_at		-0.29	-0.4	-0.12	0	0.36	1.25	1.27
1375047_at	Spata5	-0.16	-0.29	0	-0.21	0.54	0.45	1.39	spermatogenesis associated 5
1375088_at		-0.27	-0.59	0.1	-0.58	0	0.26	2.23
1375213_at	Pck2	-0.04	0	0	0.04	-0.06	0.37	1.73	phosphoenolpyruvate carboxykinase 2 (mitochondrial)
1375374_at		-0.86	-0.52	-0.45	0	0.47	0.84	1.68
1375388_at		0	0.21	-0.3	-0.26	-1.39	0.83	1.58
1375951_at	Thbd	-0.19	-0.25	-0.15	0	0.1	0.19	1.56	thrombomodulin
1375954_at	S100a13	-0.25	-0.34	-0.29	0	0.57	0.95	1.36	S100 calcium binding protein A13
1375964_at	Psph	0	-0.05	-0.16	-0.14	0.21	0.34	1.45	phosphoserine phosphatase
1376073_at	Sel1l	0.04	0	0.03	-0.05	-0.21	-0.36	1.6	sel-1 suppressor of lin-12-like (C. elegans)
1376088_at	Slc25a19	-0.91	0	-0.22	0.13	-0.25	0.45	1.68	solute carrier family 25 (mitochondrial thiamine pyrophosphate carrier), member 19
1376104_at	RGD1308319	-0.16	-0.02	0	-0.38	0.31	1.02	1.39	similar to KIAA0802 protein
1376201_at	Mett10d	-0.22	0.19	-0.14	-0.29	0	0.18	1.39	methyltransferase 10 domain containing
1376247_at	Pck2	-0.38	-1.72	-0.01	0	0.05	0.22	2.27	phosphoenolpyruvate carboxykinase 2 (mitochondrial)
1376281_at		-0.1	-0.21	0	-0.14	0.17	0.57	1.33
1376315_at	Edem2	-0.33	-0.19	0.22	0	-0.23	0.16	1.16	ER degradation enhancer, mannosidase alpha-like 2
1376349_a_at	Slc29a2	-0.28	0.25	0.04	-0.15	0	-0.66	1.17	solute carrier family 29 (nucleoside transporters), member 2
1376583_at		-0.48	-0.18	-0.03	0.18	0	0.64	1.42
1376646_at	Popdc2	-0.01	-0.58	0	-0.46	0.21	0.55	1.35	popeye domain containing 2
1376677_a_at		-0.42	-0.66	-0.44	0.22	0	0.63	1.1
1376751_at	Stk19	0	-0.33	-0.12	-0.18	0.21	0.96	1.63	serine/threonine kinase 19
1376883_at	Phospho2	-0.29	0.1	0	-0.2	-0.27	0.72	1.22	phosphatase, orphan 2
1377016_at	Creld2	0	-0.03	0.12	-0.11	-0.23	0.43	2.15	cysteine-rich with EGF-like domains 2
1377076_at	Siae	-0.48	-0.08	0.01	0	-0.2	0.13	1.16	sialic acid acetylesterase
1377234_at		0.21	-0.27	-0.14	-0.16	0	0.25	1.65
1377244_at	Zkscan5	-0.02	-0.04	-0.15	0	0.06	1.18	1.45	zinc finger with KRAB and SCAN domains 5
1377309_at		-0.37	-0.03	0	-0.25	0.29	1.42	1.24
1377393_at	Frmd5	-0.31	-0.06	-0.07	0	0.32	0.65	1.08	FERM domain containing 5
1379497_at		-1.48	0.18	0.07	0	-1.56	-1.1	1.37
1382929_at		-0.04	0	0.02	-0.33	-0.42	0.45	1.6
1382944_at		-0.52	0	0.38	-0.04	-0.6	0.53	2.66
1384584_at		-0.07	-0.25	0	-0.03	0.14	0.67	1.26
1386477_at		-0.34	0	0.02	-0.49	-0.12	0.2	1.06
1386507_at		0.59	-0.9	-0.12	0.12	0	0.32	-0.07
1387116_at	Dnajb9	-0.35	0	0.1	-0.18	-0.08	0.34	1.9	DnaJ (Hsp40) homolog, subfamily B, member 9
1387201_at	Rnf138	0	-0.23	-0.29	-0.2	0.34	0.57	1.56	ring finger protein 138
1387343_at	Cebpd	-0.2	0	-0.54	-0.17	0.13	0.82	1.16	CCAAT/enhancer binding protein (C/EBP), delta
1387605_at	Casp12	-0.15	-0.58	0	0.15	-0.08	0.45	1.23	caspase 12
1387642_at	Il23a	0	-0.03	0.13	-0.69	-0.45	0.81	3.59	Interleukin 23, alpha subunit p19
1387818_at	Casp4	0.18	-0.17	-0.32	-0.34	0	0.74	1.83	caspase 4, apoptosis-related cysteine peptidase
1387932_at	Slc1a1	-0.2	-0.23	0	0.05	-0.1	0.18	1.23	solute carrier family 1 (neuronal/epithelial high affinity glutamate transporter, system Xag), member 1
1387951_at	Cd55	0	-0.11	-0.08	-0.22	0.27	0.85	1.8	Cd55 molecule
1388210_at	Acot2	0.11	-0.39	0.14	-0.32	0	-0.53	2.92	acyl-CoA thioesterase 2
1388276_at	Hist1h3f	-0.36	-0.15	-0.37	0	0.58	1.19	1.76	histone cluster 1, H3f
1388573_at	Alkbh	-0.09	-0.28	0	-0.34	0.04	0.92	1.24	AlkB, alkylation repair homolog (E. coli)
1388583_at	Cxcl12	-0.37	-0.39	0.14	0	-0.25	0.44	1.43	chemokine (C-X-C motif) ligand 12 (stromal cell-derived factor 1)
1388593_at	Mapk8ip3	-0.45	-0.06	-0.2	0	0.26	0.88	1.48	Mitogen-activated protein kinase 8 interacting protein 3
1388923_at	Haus8	-0.39	-0.71	0	-0.15	0.26	0.94	0.56	HAUS augmin-like complex, subunit 8
1388945_at	RGD1311307	-0.16	0	-0.04	-0.36	0.39	1.21	0.68	similar to 1300014I06Rik protein
1388985_at	LOC100361467	0	-0.2	-0.11	-0.07	0.54	1.5	0.63	hypothetical LOC100361467
1389095_at	Boc	-0.28	-0.21	0.34	0.28	-0.36	0	1.1	biregional cell adhesion molecule-related/down-regulated by oncogenes (Cdon) binding protein
1389162_at	Nfu1	-0.32	-0.1	0	-0.15	0.16	0.36	1.02	NFU1 iron-sulfur cluster scaffold homolog (S. cerevisiae)
1389381_at	Sqstm1	-0.15	0.12	-0.16	0.1	-0.24	0	1.65	sequestosome 1
1389488_at		-0.35	-0.02	-0.07	0	0.6	1.13	1.15
1389578_at	Yrdc	-0.26	-0.24	-0.05	0	0.34	0.66	1.18	yrdC domain containing (E.coli)
1389596_at	Cox18	-0.09	-0.18	0	-0.23	0.36	0.76	1.45	COX18 cytochrome c oxidase assembly homolog (S. cerevisiae)
1389628_at	Plcd3	-0.17	0	-0.43	-0.06	0.24	1.17	1.23	phospholipase C, delta 3
1389634_at	Metap1	-0.24	-0.12	0	-0.15	0.23	0.76	1.26	methionyl aminopeptidase 1
1389660_at	Amigo3	-0.06	0.11	0.13	-0.13	-0.14	0	2.58	adhesion molecule with Ig like domain 3
1390021_at	Hist1h2bh	-0.13	-0.17	0	0.06	-0.02	0.4	1.22	histone cluster 1, H2bh
1390047_at		-0.01	-0.38	0	-0.13	0.36	0.45	1.48
1390128_at	Chmp1b	0	-0.21	-0.05	0.11	-0.37	0.32	1.34	chromatin modifying protein 1B
1390300_at		-0.67	-0.62	-0.17	0	0.52	0.96	0.87
1390364_at		-0.51	0	-0.42	-0.12	0.44	1.08	0.57
1390375_at	Akap8l	-0.43	0	-0.06	0.42	0.16	-0.05	0.92	A kinase (PRKA) anchor protein 8-like
1390960_at		-0.7	0.23	-0.03	0	-0.21	0.32	0.68
1391505_x_at		0.4	-1.42	-0.68	-0.47	0	0.94	1.1
1391572_at	Cars	-0.1	-0.64	0.04	-0.15	0	0.7	1.33	cysteinyl-tRNA synthetase
1392701_at	Gmppb	0.08	-0.04	0.23	0	-0.43	-0.44	1.86	GDP-mannose pyrophosphorylase B
1392773_at	Pcsk5	-0.18	-0.19	-0.22	0	0.29	0.54	1.33	proprotein convertase subtilisin/kexin type 5
1393467_at	Pcsk5	0.12	-0.06	-0.6	0	0	1.01	1.68	proprotein convertase subtilisin/kexin type 5
1393829_at	Fgfr1op2	-0.57	0	-0.41	-0.54	0.75	0.27	0.03	FGFR1 oncogene partner 2
1398247_at	Lonp1	0	-0.09	-0.11	-0.01	0.1	0.7	1.46	lon peptidase 1, mitochondrial
1398376_at	LOC100365921	-0.06	-0.13	-0.16	0	0.42	0.53	1.91	rCG31672-like
1398452_at	RGD1559923	-0.04	-0.08	0	0.01	-0.05	0.56	1.34	similar to chromosome 14 open reading frame 35
1398857_at	Surf1	-0.37	-0.36	-0.13	0	0.42	0.85	1.13	surfeit 1
1399040_at	Gba2	-0.51	-0.17	0.09	-0.13	0	0.53	1.04	glucosidase beta 2
1399141_at	Clk4	-0.26	-0.36	0	-0.09	0.6	1.26	1.25	CDC like kinase 4
1377620_at	Znf655	0	-0.22	-0.07	-0.11	0.47	1.24	1.62	zinc finger protein 655
1377647_at	Scmh1	-0.25	-0.3	-0.15	0	0.41	0.29	1.61	sex comb on midleg homolog 1 (Drosophila)
1377715_at		-0.75	0	0.14	0.09	-0.37	0	1.7
1377743_at		-0.63	-0.42	0	-0.17	0.21	0.6	0.9
1377762_at		-0.58	-0.32	-0.7	0	0.62	1	0.86
1377848_at	Fam175a	-0.19	-0.06	-0.05	0	0.6	1.2	0.91	family with sequence similarity 175, member A
1377849_at	Vcpip1	-0.19	-0.35	0	-0.39	0.26	1.02	1.36	valosin containing protein (p97)/p47 complex interacting protein 1
1378002_at	Hspa4l	-0.37	0.05	-0.26	0	-0.72	0.29	1.33	heat shock protein 4 like
1378021_at		0	-0.17	-0.14	-0.41	0	0.42	1.69
1378119_at	Zc3h8	-0.28	-0.18	0.09	-0.17	0	0.38	1.2	zinc finger CCCH type containing 8
1378226_at	Taf1d	0	-1.49	-0.36	-0.99	0.73	1.25	0.39	TATA box binding protein (TBP)-associated factor, RNA polymerase I, D, 41kDa
1378614_at		-0.58	-0.84	0	-0.3	0.67	0.87	0.21
1379043_at		-0.2	-0.21	0	-0.15	0.48	1.35	0.83
1379567_at	Med13	-0.08	-0.14	0	-0.2	0.52	0.94	1.64	mediator complex subunit 13
1379945_at		-0.13	0.15	-0.44	-0.45	0	0.92	1.93
1380068_at		-0.28	0	-0.08	-0.31	0.5	0.67	1.16
1380195_at		0	-0.52	0.2	-0.06	-0.85	0.62	1.35
1380243_at	RGD1304693	-0.14	-0.02	-0.01	0	0.83	1.2	0.85	similar to CG14803-PA
1380448_at	Alkbh	0	-0.52	-0.03	0.14	-0.02	0.64	1.45	alkB, alkylation repair homolog (E. coli)
1381028_at		0.41	-0.22	0	-0.01	-0.98	0.21	1.7
1381052_at		-0.71	-0.8	-0.4	0	0.77	1.24	0.55
1381289_at	Haus8	-0.38	-0.88	-0.18	0	0.14	0.94	0.18	HAUS augmin-like complex, subunit 8
1381324_at		-0.46	-0.7	-0.61	0	0.02	1.39	0.64
1381326_at		-1.25	0.26	0.14	-0.33	-0.56	0.04	0
1381390_at	Cnst	0	-0.43	-0.13	-0.14	0.23	0.37	1.49	consortin, connexin sorting protein
1381807_at		-0.23	0	-0.09	-0.18	0.45	0.85	1.19
1381969_at		-0.2	-0.03	0	-0.01	0.12	0.39	1.18
1382278_at		-0.88	-0.57	-0.55	0	0.32	0.77	1.47
1382312_at	Arid5b	-0.19	-0.33	-0.12	0	0.31	0.31	1.16	AT rich interactive domain 5B (Mrf1 like)
1382466_at	Snrnp48	-0.42	-0.22	0	-0.09	0.25	0.55	1.13	small nuclear ribonucleoprotein 48k (U11/U12)
1382500_at		-0.2	-0.12	-0.12	0	0.45	0.88	1.94
1382616_at	Gls	-0.22	-0.04	-0.28	0	0.34	0.85	1.28	glutaminase
1382623_at	Rhebl1	-0.52	0	-0.1	0.37	0.1	-0.08	1.02	Ras homolog enriched in brain like 1
1382673_at		-0.77	0	-0.12	-0.49	0.45	0.64	0.67
1382688_at	Slc25a37	-0.44	-0.24	-0.12	0	0.19	0.07	1.4	solute carrier family 25, member 37
1382789_at		-0.61	-0.38	0	-0.18	0.35	0.78	0.75
1382965_at		-0.93	-0.57	-0.97	0	0.74	0.82	1.52
1383001_at		-0.1	0	-0.33	-0.46	0.43	1.26	1.37
1383239_at	Zcchc7	-0.09	-0.23	-0.15	0	0.12	0.9	1.31	zinc finger, CCHC domain containing 7
1383362_at		-0.5	-0.27	0	-0.05	0.32	0.78	1.24
1383379_at	LOC684112	-0.15	-0.26	-0.38	0	0.35	1.43	1.29	similar to KIAA0999 protein
1383409_at		-0.3	-0.11	-0.05	0	0.52	1.35	0.64
1383510_at		-1.8	-0.33	-0.15	0.03	0.2	0	0.75
1383661_at		0.29	-0.15	-0.05	-0.53	0	0.85	2.15
1383690_at	RGD1564776	0	-0.65	0.37	-1.34	0.19	0.59	-0.34	similar to ornithine decarboxylase-like protein
1383837_at	Yipf3	0.17	-1.29	0	-0.57	-0.64	0.04	0.27	Yip1 domain family, member 3
1383880_at		-0.23	-0.04	0	-0.09	0.31	1.04	1.25
1383978_at		-0.14	0.06	0	-0.31	-0.42	0.26	1.91
1384115_at	Acot2	0.12	0.42	-0.27	-0.87	0	-0.38	2.65	Acyl-CoA thioesterase 2
1384238_at		0	0.34	-0.01	-0.33	0.63	1.33	-0.19
1384260_at		-0.33	0	0.53	0.2	-0.37	-0.36	1.08
1384290_at	Rbbp6	0	-0.25	-0.51	-0.59	0.76	0.19	1.54	retinoblastoma binding protein 6
1384363_at	Sbds	0.06	-1.41	0	-0.13	-0.57	0.19	1.5	Shwachman-Bodian-Diamond syndrome homolog (human)
1384367_at	RGD1563516	-0.06	0	0.28	-0.2	-0.09	0.69	1.55	similar to histone protein Hist2h3c1
1384452_at	Zcchc7	-0.18	0	-0.1	-0.15	0.35	0.66	1.18	Zinc finger, CCHC domain containing 7
1384699_at		-0.07	-0.15	-0.1	0	1.28	0.89	0.06
1384892_at		-0.33	-0.22	-0.09	0	0.88	1.42	0.82
1385322_at		-0.19	-0.03	0	-0.31	0.56	1.15	0.7
1385445_at		0	-0.27	-0.11	-0.26	0.16	1.17	1.57
1385675_at	RGD1308775	-0.22	0	-0.34	-0.19	0.21	0.98	1.36	similar to RIKEN cDNA 4921536K21
1385860_at	Rspry1	-0.83	0.53	-0.41	0	-0.23	0.06	0.11	ring finger and SPRY domain containing 1
1386059_at	Hist2h2be	-0.29	-0.36	0	-0.03	0.13	0.42	1.27	histone cluster 2, H2be
1386119_at	LOC689147	-0.37	-0.15	0	-0.48	0.77	0.85	1.04	Hypothetical protein LOC689147
1386550_at	Ikzf5	-0.21	-0.19	-0.49	0	0.24	0.77	1.31	IKAROS family zinc finger 5
1386662_at		-0.13	-0.22	-0.04	0	0.18	0.78	1.69
1386828_at	Rundc1	-0.58	0	-0.13	-0.18	0	0.46	0.88	RUN domain containing 1
1390767_at	Ssr1	-0.13	-0.21	0	0.1	-0.05	0.27	1.32	signal sequence receptor, alpha
1391304_at	LOC363188	-0.49	-0.39	-0.19	0	0.78	1.29	0.71	similar to ubiquitin protein ligase E3 component n-recognin 2
1391433_at	Acot2	0.02	0	0	-0.04	-0.35	-0.69	2.51	acyl-CoA thioesterase 2
1391481_at		0	-0.26	-0.09	-0.12	0.18	1.29	2.21
1391607_at	RGD1566319	0	-0.02	-0.17	-0.07	0.54	0.89	1.82	similar to Sestrin 2 (Hi95)
1391636_at		-0.42	-0.41	0	-0.15	0.28	0.65	0.96
1391663_at		-0.62	0	-0.17	-0.34	0.16	0.57	1.35
1391811_at		-0.3	0	-0.27	-0.36	0	0.16	1.03
1391819_at	RGD1307394	0	-0.02	-0.03	-0.83	0.14	0.43	1.41	similar to hypothetical protein ET
1391870_at		-0.59	-0.74	-0.31	0	0.4	1.13	0.46
1391944_at		-0.01	-0.21	-0.03	0	0.32	0.42	2.04
1392512_at	Hist3h2ba	-0.36	-0.35	0	-0.56	0.37	1.02	2.2	histone cluster 3, H2ba
1392531_at	Ttpal	-0.14	0	-0.19	-0.19	0.32	1.18	0.69	tocopherol (alpha) transfer protein-like
1392541_at	Ggct	-0.29	-0.15	0	-0.1	0.02	0.54	2.02	gamma-glutamyl cyclotransferase
1392559_at	Uhrf1bp1l	-0.5	0.07	0	-0.33	-0.47	0.15	1.02	UHRF1 binding protein 1-like
1392579_at	Obfc2a	-0.13	-0.03	-0.04	0	0.87	1.23	1.17	oligonucleotide/oligosaccharide-binding fold containing 2A
1392627_x_at		-0.16	-0.42	-0.02	0	0.18	1.05	1.29
1392640_at	Cry1	0	-0.25	-0.12	-0.2	0.07	0.52	1.42	cryptochrome 1 (photolyase-like)
1392755_at	Lrrc8c	-0.2	0	-0.04	-0.28	0.42	1.24	0.99	leucine rich repeat containing 8 family, member C
1392789_at	Slc25a36	-0.68	-0.29	-0.23	0	0.19	0.48	0.86	solute carrier family 25, member 36
1392865_at	Fgf9	-0.46	-0.2	0	0.12	-0.45	0.62	2.39	fibroblast growth factor 9
1393009_at	Fv1	-0.38	0	-0.36	-0.35	0.65	0.94	1.51	Friend virus susceptibility 1
1393057_at	Zfp772	-0.43	0	-0.17	-0.36	0.29	1.16	1.24	zinc finger protein 772
1393122_at	LOC100364467	-0.37	0	-0.36	-0.17	0.28	0.61	1.03	rCG36634-like
1393213_at	Ccnl2	-0.1	0	0.11	-0.03	-0.19	0.52	1.4	cyclin L2
1393294_at		-0.11	-0.16	-0.17	0	0.61	1.39	1.16
1393303_at		0	-1.76	-0.77	-0.81	0.11	0.91	0.71
1393396_at	Sft2d3	-0.8	0.26	0	-0.17	0.16	-0.25	0.67	SFT2 domain containing 3
1393629_at	Hlx	-2.52	0.07	-0.18	0	-0.27	1.52	1.42	H2.0-like homeobox
1393713_at	Gmds	-0.51	0	-0.21	0.25	0.05	0	0.89	GDP-mannose 4, 6-dehydratase
1393802_x_at	Gsg1	-1.51	-0.55	0	-0.97	0.07	1.2	1.67	germ cell associated 1
1393843_at	Fem1b	-0.34	0	-0.29	-0.37	0.29	0.73	1.24	fem-1 homolog b (C. elegans)
1393961_at		0.01	-0.11	0	-0.29	-0.11	0.17	1.5
1393983_at	Xpot	-0.4	0.01	0	-0.01	-0.12	0.05	1.31	exportin, tRNA (nuclear export receptor for tRNAs)
1394278_at		0.09	-0.28	0	-0.28	-0.08	1.36	2.02
1394459_at	FAM120C	-0.25	-0.41	-0.23	0	0.03	0.47	1.11	family with sequence similarity 120C
1394562_at		-1	-1.23	0	0.17	-0.12	0.46	1.59
1394621_at	Smox	0	0.17	-0.08	-0.38	-0.17	1.45	1.15	spermine oxidase
1394714_at	Atp2b1	-0.04	0.07	-0.09	0	-0.1	0.9	1.59	ATPase, Ca++ transporting, plasma membrane 1
1395329_at	Gmppb	0	-0.53	0.11	0.14	-0.11	-0.54	1.82	GDP-mannose pyrophosphorylase B
1395533_at	Hars	-0.19	-1.08	0	0.26	-0.33	0.6	1.29	histidyl-tRNA synthetase
1395557_at		0.42	0.06	0	-0.1	-1.14	-0.22	0.64
1395699_at	Riok3	-0.17	-0.34	-0.13	0	0.04	0.52	1.35	RIO kinase 3 (yeast)
1395739_at	Efr3a	-0.45	-0.51	0.02	0	-0.18	0.1	0.89	EFR3 homolog A (S. cerevisiae)
1395896_at		-0.47	0	-0.08	-0.3	0.37	0.64	0.91
1395965_at		-0.13	0.05	-0.3	-0.4	0.05	0	1.2
1395998_at	Nop56	-0.34	-0.6	0	0.21	-0.4	0.03	1.09	NOP56 ribonucleoprotein homolog (yeast)
1396112_at	Mtmr10	0.05	-0.55	-0.03	-0.05	0	0.72	2.45	myotubularin related protein 10
1396128_at	Gpbp1	0	-0.23	0.23	0.48	-0.52	-0.16	1.42	GC-rich promoter binding protein 1
1396363_at		-0.28	-0.11	0	-0.31	0.48	1.15	1.49
1396716_at	Rab23	0	-0.01	-0.29	-0.12	0.28	0.39	1.58	RAB23, member RAS oncogene family
1396850_at		-0.38	-0.34	0.04	0	-0.04	0.55	1.02
1397164_at		-0.58	-0.97	-0.23	0.17	0	0.54	1.22
1397207_at	Otud4	-0.57	-0.2	0.11	0.13	0	-0.54	1.48	OTU domain containing 4
1397487_at	Xpnpep3	-0.42	-0.04	-1.03	0	0.74	0.69	1.29	X-prolyl aminopeptidase (aminopeptidase P) 3, putative
1397520_at	Eif4g2 /// Eif4g2-ps1	0	-1.6	-0.24	0.08	-0.75	0.07	0.5	eukaryotic translation initiation factor 4, gamma 2 /// eukaryotic translation initiation factor 4, gamma 2, pseudogene 1
1397748_at	Mrm1	-0.44	-0.64	-0.05	0	0.2	0.43	0.92	Mitochondrial rRNA methyltransferase 1 homolog (S. cerevisiae)
1397878_at		-1.28	0.01	0	1.07	-0.09	-0.11	0.27
1397886_at	Zc3h8	-0.15	-0.06	0	-0.48	0.28	0.3	1.32	zinc finger CCCH type containing 8
1397897_x_at		-0.31	-0.51	-0.14	0	0.61	0.69	1.13
1398107_at	Ggct	-0.6	0.07	0	-0.71	-3.9	1.48	2.6	gamma-glutamyl cyclotransferase
1398660_at	Slc35f2	-0.09	-0.15	0	-0.53	0.35	0.37	1.56	solute carrier family 35, member F2
1398706_at		-0.14	0	-0.1	-0.11	0.5	0.75	1.36

## Sheet: Table S3
Supplementary data Table S3
List of genes of cluster Down-I.
Probe Set ID	Gene Symbol	Expression levels (log2)							Gene Title
		Control	NaF (0 mM)			NaF (2 mM)
			3 h	6 h	12 h	3 h	6 h	12 h
1367683_at	Kpna2	0.09	0.04	0	0.08	-0.41	-1.36	-0.29	karyopherin alpha 2
1367919_at	Nup210	0	0.02	0.08	0.21	-0.64	-2.01	-0.83	nucleoporin 210
1367933_at	Amd1	0.01	0.25	0	0.01	-0.35	-1.39	-0.52	adenosylmethionine decarboxylase 1
1368073_at	Irf1	0	0.22	0.14	0.08	-1.41	-1.59	-1.84	interferon regulatory factor 1
1368136_at	Tmpo	0	0.09	0	0.1	-0.45	-1.56	-1.33	thymopoietin
1368174_at	Egln3	0.5	0.42	0.05	0	-0.4	-0.92	-0.55	EGL nine homolog 3 (C. elegans)
1368511_at	Bhlhe41	0.11	0.1	0.06	0	-0.9	-2.01	-1.62	basic helix-loop-helix family, member e41
1368811_at	Lmnb1	0.45	0	0.41	0.44	-0.4	-1.01	-0.26	lamin B1
1368870_at	Id2	0.39	0.09	0.14	0	-1.1	-1.83	-1.94	inhibitor of DNA binding 2
1368938_at	Dll1	0.18	0	0.18	0.84	-3.95	-4.52	-5.1	delta-like 1 (Drosophila)
1370048_at	Lpar1	0	0.1	0.22	0.22	-0.54	-1.72	-1.03	lysophosphatidic acid receptor 1
1370196_at	Pias3	0.05	0	0.27	0.15	-0.78	-1.64	-1.54	protein inhibitor of activated STAT, 3
1370256_at	Fzd1	0.3	0	0.26	0.37	-0.94	-2.34	-1.78	frizzled homolog 1 (Drosophila)
1370297_at	Plk1	0.52	0	0.55	0.41	-0.16	-1.37	-0.27	polo-like kinase 1 (Drosophila)
1370663_at	Wee1	0.19	0.39	0	0.07	-0.99	-1.19	-0.8	wee 1 homolog (S. pombe)
1371044_at	Pde7a	-0.05	0	0.06	0.21	0.08	-1.67	-1.09	phosphodiesterase 7A
1371804_at	Cdadc1	0.12	0.18	0	0.15	-0.68	-1.34	-0.24	cytidine and dCMP deaminase domain containing 1
1371923_at	Lpcat1	0.07	-0.07	0	0.04	-1.06	-1.54	0.01	lysophosphatidylcholine acyltransferase 1
1371953_at	Ccng2	0	0.16	0.29	0.42	-0.42	-1.36	-1.12	cyclin G2
1372148_at	Commd2	0	0.03	0.05	0.2	-0.75	-1.47	-0.66	COMM domain containing 2
1372186_a_at	Top2a	0.29	0	0.26	0.6	-0.23	-1.16	-0.66	topoisomerase (DNA) II alpha
1372508_at	Tnrc6a	0.27	0	0.05	0.47	-1.24	-1.15	-0.99	trinucleotide repeat containing 6a
1372531_at	Ppfibp2	0.07	0	0.26	0.38	-0.13	-1.42	-0.77	PTPRF interacting protein, binding protein 2 (liprin beta 2)
1372633_at	Spg20	0	0.12	0.21	0.19	-0.65	-1.5	-0.65	spastic paraplegia 20 (Troyer syndrome) homolog (human)
1372682_at	RGD1307218	0	0.01	0.03	0.06	-0.73	-1.23	-1.49	similar to RIKEN cDNA 2810432L12
1372876_at	Sephs2	-0.09	0	0.12	0.03	-0.98	-1.58	0.03	selenophosphate synthetase 2
1373038_at	Mllt10	0.17	0.02	0	0.13	-0.35	-1.27	-0.09	myeloid/lymphoid or mixed-lineage leukemia (trithorax homolog, Drosophila); translocated to, 10
1373085_at	Cbr3	0	0.36	0.36	0.41	-0.52	-1.44	-1.68	carbonyl reductase 3
1373183_at		0	0.39	0.6	0.78	-0.41	-1.55	-0.23
1373489_at	Chaf1a	0	0.21	0.02	0.04	-0.51	-1.48	-0.36	chromatin assembly factor 1, subunit A (p150)
1373532_at	Plekhf1	0.27	0	0.14	0.17	-1.04	-1.57	-0.3	pleckstrin homology domain containing, family F (with FYVE domain) member 1
1373566_at	LOC679357	0	0.31	0	0.22	-1.16	-1.56	-0.31	similar to interferon regulatory factor 2 binding protein 2
1373897_at	Lmnb1	0.05	0.12	0	0.19	-0.58	-2.06	-1.03	Lamin B1
1374045_at	Cog8	0	0.13	0.05	-0.07	-0.79	-1.36	0	component of oligomeric golgi complex 8
1374079_at	Dcun1d4	0	0.06	0.02	0.06	-0.14	-1.38	-0.86	DCN1, defective in cullin neddylation 1, domain containing 4 (S. cerevisiae)
1374335_at		0.47	0.63	0	0.31	-0.17	-1.31	-1.27
1374540_at	Cdca7	0	0.1	0.13	0.19	-0.59	-1.58	-0.15	cell division cycle associated 7
1374604_at	Mfsd9	0.14	0.36	0.1	0	-0.51	-1.53	-1.18	major facilitator superfamily domain containing 9
1374636_at	Phf17	0	0.2	0.4	0.55	-0.34	-1.34	-0.69	PHD finger protein 17
1374644_at		0.45	0.33	0.29	0	-0.81	-2.26	-0.63
1374780_at		0.47	0.62	0	0.6	-0.26	-1.16	-0.75
1374978_at	Cbx2	0	0.09	0.58	0.55	-0.84	-1.72	-0.43	chromobox homolog 2 (Pc class homolog, Drosophila)
1374989_at	Asb12	0.01	0.3	0	0.15	-0.59	-2.48	-2.84	ankyrin repeat and SOCS box-containing 12
1375016_at		0	0.29	0.27	0.47	-0.36	-1.37	-1.02
1375521_at	Tceal8	0.06	0	0.19	0.03	-0.54	-1.13	-1.41	transcription elongation factor A (SII)-like 8
1375532_at		0.2	0.07	0	0.13	-1.19	-2.16	-1.12
1375879_at		0	0.02	0.02	0.32	-0.51	-2.68	-2.54
1375939_at	LOC681004	0.19	0.12	-0.06	0.23	-0.44	-1.36	0	similar to GC-rich sequence DNA-binding factor homolog
1375988_at	LOC680262	0.23	0	0.19	0.15	-1.85	-1.53	-0.2	hypothetical protein LOC680262
1375993_at		0.06	0.3	0	0	-0.9	-1.53	-0.27
1376034_at	Fam115a	0	0.18	0	0.11	-0.97	-1.35	-1.73	family with sequence similarity 115, member A
1376084_a_at	Espl1	0.39	0	0.74	0.85	-0.35	-1.75	-0.88	extra spindle pole bodies homolog 1 (S. cerevisiae)
1376099_at	Col5a1	0.19	0	0.38	0.4	-0.63	-1.29	-0.89	Collagen, type V, alpha 1
1376151_a_at	LOC100365106	0.17	0.24	0	0	-0.8	-1.48	-1.76	rCG32755-like
1376202_at	B3gnt1	0	0.3	0.33	0.15	-0.88	-1.48	-0.5	UDP-GlcNAc:betaGal beta-1,3-N-acetylglucosaminyltransferase 1
1376381_at	Xkr5	0.17	0	0.31	0.2	-0.53	-1.53	-1.39	XK, Kell blood group complex subunit-related family, member 5
1376485_at	Traip	0.31	-0.1	0.14	0.17	-0.16	-1.05	0	TRAF-interacting protein
1376533_at	Baz2b	0.35	0.13	0	0.11	-0.64	-1.02	-1.34	bromodomain adjacent to zinc finger domain, 2B
1376742_at		0.57	0	0.68	0.36	-0.91	-1.63	-0.83
1376773_at		0.19	0.01	0	0.11	-0.19	-1.16	-0.55
1376860_at	Slc22a23	0	0.1	0.03	0.03	-0.07	-1.35	-1.04	solute carrier family 22, member 23
1376990_at		0.09	0.16	0	0.15	-0.75	-1.48	-0.84
1377043_at		0.1	0.56	0	0.26	-0.36	-1.49	-0.79
1377311_at	Emx2	0.13	0	0.1	-0.09	-0.94	-2.03	0.01	empty spiracles homeobox 2
1377469_at		0	0.13	0	0.07	-0.41	-1.35	-1.1
1379375_at	Pdgfa	0.08	0.09	0	0.11	-0.42	-1.46	-0.83	Platelet-derived growth factor alpha polypeptide
1379438_at	Smarcad1	0	0.03	0.05	0.11	-0.41	-1.34	-1.06	SWI/SNF-related, matrix-associated actin-dependent regulator of chromatin, subfamily a, containing DEAD/H box 1
1379479_at	Kif4	0.01	0.07	0	0.35	-0.41	-1.46	-1.31	kinesin family member 4
1380123_at	Tmem79	0	0.08	0.08	0.02	-0.6	-1.44	-0.77	transmembrane protein 79
1383192_at	Spast	0	0.33	0.35	0.38	-0.16	-1.44	-0.34	spastin
1383205_at	Dact2	0.42	0.23	0	0.37	-1.86	-2.56	-2.61	dapper, antagonist of beta-catenin, homolog 2 (Xenopus laevis)
1383406_at		0.24	0.13	0	0.1	-0.26	-1.31	-0.76
1383877_a_at		0.25	0.11	0.05	-0.02	-1.2	-1.18	0
1384204_at		0.15	0.24	0	0.05	-0.4	-1.22	-0.18
1385243_at		0	0.02	0.41	0.49	-0.49	-1.53	-1.21
1385869_at		0.18	-0.01	0.14	0	-1.38	-0.45	0.23
1386836_at	Znf574	0.3	-0.18	0.19	0	-1.29	-0.45	0.16	zinc finger protein 574
1386852_x_at	Ubb	0.32	0.15	0	0.06	-0.53	-1	-0.35	ubiquitin B
1386910_a_at	Apex1	0.12	0	0.32	0.29	-0.36	-1.23	-0.13	APEX nuclease (multifunctional DNA repair enzyme) 1
1387028_a_at	Id1	0.22	0.15	0	0.01	-1.05	-1.18	-0.74	inhibitor of DNA binding 1
1387440_at	Ireb2	0.28	-0.21	0.15	0.16	-0.32	-1.14	0	iron responsive element binding protein 2
1387726_at	Cdx2	0.31	0	0.08	0.13	-0.62	-1.38	-0.47	caudal type homeo box 2
1387895_s_at	Cdc20	0.42	0	0.03	0.49	-0.47	-1.78	-1.14	cell division cycle 20 homolog (S. cerevisiae)
1388230_at	Jub	0.24	-0.51	0.12	0.28	-1.09	-0.74	0	jub, ajuba homolog (Xenopus laevis)
1388722_at	Dnajb1	0.15	0.08	0	0.08	-0.92	-1.45	-0.81	DnaJ (Hsp40) homolog, subfamily B, member 1
1389163_at	Trim32	0.01	0.11	0.2	0	-1.25	-1.43	-0.34	tripartite motif-containing 32
1389366_at	Znf553	0.06	0.04	0.03	0	-1.61	-1.79	-0.32	zinc finger protein 553
1389554_at		-0.09	0.15	0.26	0.26	-0.35	-1.55	0
1389568_at	Calhm2	0.15	0	0.07	0.12	-0.42	-1.17	-1.38	calcium homeostasis modulator 2
1389677_at	Syde1	0.03	0.09	0.4	0	-1.12	-1.52	-1.95	Synapse defective 1, Rho GTPase, homolog 1 (C. elegans)
1389800_at	Pwwp2b	0.01	0.06	0.09	0	-0.89	-1.46	-0.52	PWWP domain containing 2B
1390024_at		0.23	0.17	0.08	0	-1.84	-1.12	-0.59
1390137_at	Traf4af1	0.14	0	0.01	0.23	-0.62	-1	-1.26	TRAF4 associated factor 1
1390249_at	RGD1305464	0.06	0.35	0.08	0	-1.45	-0.99	-0.28	similar to human chromosome 15 open reading frame 39
1390463_at		0.15	-0.42	0	0.02	0.05	-1.36	-0.81
1391509_at	Tacstd2	0.19	0.05	0	0	-0.6	-1.39	-0.63	tumor-associated calcium signal transducer 2
1392633_at		-0.2	0	0.05	0.2	-2.02	-0.74	0.34
1393494_at		0.35	0.21	0	0.23	-0.64	-1.82	-0.31
1398304_at	Fzd2	0	0.15	0.04	0.18	-1.05	-1.94	-1.81	frizzled homolog 2 (Drosophila)
1398373_at	B3galnt1	0.25	0	0.33	0.43	-0.54	-2.03	-1.18	beta-1,3-N-acetylgalactosaminyltransferase 1
1398440_at	Sfrs18	0.03	0	0.18	0.33	-0.97	-1.54	-0.12	splicing factor, arginine/serine-rich 18
1399123_at	Ints6	0.1	0.16	0	0	-0.4	-1.25	-0.44	integrator complex subunit 6
1399167_a_at	Gab1	0.16	0.07	-0.13	0.13	0	-1.51	-1.15	GRB2-associated binding protein 1
1377746_at	Rbm12	0.63	0.15	-0.11	0	0.14	-1.65	-0.7	RNA binding motif protein 12
1377996_at		0.07	-0.2	0	0.07	-1.08	-1.26	0.1
1378049_at	Zfp362	0.16	0	0.11	0.1	-0.21	-1.81	-1.93	Zinc finger protein 362
1378116_at	Zbtb45	0	0.02	0.14	0.27	-0.6	-1.63	-0.19	zinc finger and BTB domain containing 45
1378214_at		0	0.13	0.3	0.57	-0.89	-2.14	-1.15
1378324_at	Ttc30b	0.03	0	0.21	0.4	-0.75	-1.47	-0.93	tetratricopeptide repeat domain 30B
1378332_at	Klf3	-0.05	0	0.29	0.28	-1.18	-1.41	0.08	Kruppel-like factor 3 (basic)
1378361_at		0.15	-0.05	0	0.2	-0.65	-1.57	0.28
1378654_at		0.16	0	0.08	0.24	-0.3	-1.18	-0.39
1378947_at	Tns4	0.15	0.37	0	0.12	-0.32	-1.33	-1.11	tensin 4
1379236_at		0.5	0.45	0	0.35	-0.32	-0.84	-0.83
1379238_at	Ctdspl	0.38	-0.01	0.84	0.5	0	-1.41	-0.57	CTD (carboxy-terminal domain, RNA polymerase II, polypeptide A) small phosphatase-like
1379315_at	Rassf7	0.14	0.21	0	0.17	-0.5	-1.21	-0.86	Ras association (RalGDS/AF-6) domain family (N-terminal) member 7
1379316_at		0.19	0	0.31	0.17	-0.49	-1.23	-0.74
1379384_at	Sp1	0.21	0.22	0.35	0	-0.17	-1.12	-0.15	Sp1 transcription factor
1379404_at		0.16	0	0.15	0.34	-1.21	-1.76	-1.71
1379621_at	Sertad3	0.11	0	0.36	0.44	-1.3	-1.53	-0.6	SERTA domain containing 3
1379652_at	RGD1559696	0	0.08	0.08	0.11	-0.6	-1.51	-0.26	similar to kinesin-like protein (103.5 kD) (klp-6)
1379942_at	Sox2	0.36	0	0.41	0.09	-1.18	-1.27	-0.66	SRY (sex determining region Y)-box 2
1379982_at	Nrip1	0.11	0	0.34	0.38	-0.27	-1.34	-0.19	nuclear receptor interacting protein 1
1380598_at		0.21	0.23	0	0.29	-0.65	-1.78	-0.38
1380997_at	Ccnj	0.18	0.43	0.08	0	-1.3	-0.66	-0.07	cyclin J
1381481_at		0	0.05	0.09	-0.15	-1.82	-0.52	0.23
1381874_at	Sox2	0	0.29	0.39	0.52	-1.11	-3.98	-0.76	SRY (sex determining region Y)-box 2
1381986_at	LOC685707	0.11	0.25	0	0.23	-0.7	-1.48	-1.65	Similar to neuron navigator 1
1382003_at	Slc16a13	0.03	0	0.2	0.14	-0.65	-1.68	-0.64	solute carrier family 16, member 13 (monocarboxylic acid transporter 13)
1382220_at		0.19	0.24	0	0.08	-0.48	-1.69	-0.72
1382258_at	Rgnef	0.02	0	0.4	0.14	-0.68	-1.57	-0.63	Rho-guanine nucleotide exchange factor
1382389_at	Arhgef5	0.05	0.27	0.06	0	-0.35	-1.39	-1	Rho guanine nucleotide exchange factor (GEF) 5
1382421_at		0.18	0.14	0	0.16	-0.3	-1.62	-1.37
1382472_at		0.21	0.2	0	0.24	-1.2	-1.29	-0.92
1382493_at	Cenpf	0.01	0	0.12	0.47	-0.23	-1.56	-0.97	centromere protein F
1382514_at		0.4	0	0.15	0.01	-1.36	-1.44	-0.58
1382685_at	Slit2	0.97	0.66	0.4	0	-1.11	-0.78	-0.82	slit homolog 2 (Drosophila)
1382749_at	Rbm5	0	-0.1	0.22	0.33	-1.47	-0.52	0.04	RNA binding motif protein 5
1382949_at	Rdh12	0.01	0.28	0.27	0	-0.09	-1.43	-0.43	retinol dehydrogenase 12 (all-trans/9-cis/11-cis)
1383095_at	LOC680155	0.36	0	0.27	0.12	-0.12	-1.25	-0.19	hypothetical protein LOC680155
1383382_at	LOC681740	0.31	0	0.39	0.52	-0.2	-1.07	-0.39	similar to jumonji protein
1383405_at	LOC100364681	0	0.1	0.08	0.02	-0.56	-1.33	-0.75	rCG45515-like
1383571_at	Rapgefl1	0.04	0	0.06	0.38	-0.64	-1.73	-1.58	Rap guanine nucleotide exchange factor (GEF)-like 1
1383619_at	Mtmr4	0	0.1	0.32	0.22	-0.7	-1.51	-0.24	myotubularin related protein 4
1383673_at	Nap1l2	0.06	0	0.34	0.19	-0.93	-2.62	-1.07	nucleosome assembly protein 1-like 2
1383849_at	Rfx7	0.4	-0.06	0.31	0.15	0	-0.95	-0.3	regulatory factor X, 7
1383862_at		0.36	0.15	0.14	0	-1.58	-1.71	-0.79
1383951_at	Rnf145	0	0.29	0.09	0.4	-0.58	-1.69	-1.14	ring finger protein 145
1383964_at		0.23	0.21	0.02	0	-0.6	-1.5	-0.64
1384000_at	Sox4	0.04	0.45	0	0.13	-0.07	-1.4	-0.21	SRY (sex determining region Y)-box 4
1384139_at	Gja7	0.32	0.03	0.05	0	-0.68	-1.28	-1.63	gap junction membrane channel protein alpha 7
1384175_at	Efna4	0.33	0	0.2	0.22	-1.42	-2.52	-0.84	ephrin A4
1384254_at	Otud1	0.11	0	-0.02	0.16	0.12	-1.52	-1.29	OTU domain containing 1
1384312_at	Irx1	0.02	0.25	0.11	0	-0.35	-1.31	-0.07	iroquois homeobox 1
1384407_at	Nmral1	0.7	0	-0.15	0.29	-0.11	-0.65	0.04	NmrA-like family domain containing 1
1384488_at	Cdkn2d	0	0.04	0.25	0.28	-0.45	-1.47	-0.85	similar to cyclin-dependent kinase inhibitor 2D
1384762_at		0	0.12	0.26	0.39	-0.46	-1.39	-0.58
1384783_at	Zfp161	0.19	0.14	0	0.05	-1.05	-1.45	-0.35	zinc finger protein 161
1384937_at	Rbak	-0.02	0.02	0.06	-0.04	-1.9	0	0.39	RB-associated KRAB zinc finger
1384988_at	Fbxo5	0.68	0	-0.03	0.87	-0.85	-0.23	0.15	F-box protein 5
1385070_at		0.02	0.07	0.09	0	-0.97	-1.66	-0.65
1385122_at		0.63	-0.25	0.97	0.9	0	-1.21	-0.51
1385339_at		0.86	0	-0.66	-0.84	0	-0.74	0.22
1385472_at	Zbtb8a	0.04	0.23	0	0.05	-1.1	-1.82	-0.68	zinc finger and BTB domain containing 8a
1385592_at	Bcor	0.14	0	0.13	0.15	-0.12	-1.18	-0.24	BCL6 co-repressor
1385597_at	Znf763	0.02	0.22	0	0.19	-1.39	-2.22	-1.01	zinc finger protein 763
1385671_at		0.1	0.37	0	0.02	-0.74	-1.84	-1.33
1385760_at		0.26	0.26	0.01	0	-0.17	-1.42	-0.69
1385761_s_at		0.72	0.43	0	0.18	-0.11	-0.99	-0.72
1385781_at	Ercc6l	0.38	0.22	0.13	0	-0.55	-0.95	-0.72	excision repair cross-complementing rodent repair deficiency complementation group 6 - like
1385873_at	Usp42	0.11	0	0.11	0.17	-0.92	-1.34	-0.39	ubiquitin specific peptidase 42
1386435_at	Tcfap4	-0.38	0	0.15	0.08	-0.94	-1.71	0.25	transcription factor AP4
1390763_at		0.39	0	0.4	0.54	-0.47	-1.23	-1.3
1390874_at	Ireb2	0.17	0.08	0	0.13	-0.53	-1.17	-0.42	Iron responsive element binding protein 2
1390892_at	Depdc1b	0.27	0	0.22	0.32	-0.5	-1.35	-0.51	DEP domain containing 1B
1390913_at		0.08	0.1	0.07	0	-1.4	-1.2	-0.57
1391026_at		0.64	-0.11	0.08	0.39	-0.71	-0.68	0
1391190_at	Tnrc6a	0.21	0	0.25	0.25	-1.41	-1.66	-0.81	trinucleotide repeat containing 6a
1391414_at	LOC679811	0	0.13	0.14	0.19	-0.64	-1.56	-1.05	similar to RIKEN cDNA D930015E06
1391477_at		0	0.02	0.29	0.39	-0.52	-1.38	-0.78
1391486_at		0	0.19	0.05	0.14	-0.16	-1.42	-0.72
1391507_at	Znf467	0	0.13	0.35	0.44	-0.88	-1.63	-0.75	zinc finger protein 467
1391549_at	Dcun1d4	0.57	0	0.35	0.12	-0.36	-1.3	-0.88	DCN1, defective in cullin neddylation 1, domain containing 4 (S. cerevisiae)
1391580_at		0	0.2	-0.36	0.12	-0.89	-1.55	0
1391711_at		0	0.15	0.1	0.24	-0.93	-2.17	-0.85
1391725_at		0.98	0.84	0	0.36	-0.16	-0.52	-0.15
1391863_at		0.14	0	0.65	0.94	-1.73	-1.72	0
1391887_at	Igsf9	0.17	0	0.41	0.61	-1.11	-1.37	-0.24	immunoglobulin superfamily, member 9
1392065_at	Kif18a	0.11	-0.28	0.48	0.78	0	-2.07	-1.08	kinesin family member 18A
1392204_at	Zfp90	0.23	0	0.27	0.18	-0.61	-1.43	-0.34	zinc finger protein 90
1392269_at	Sin3a	0.99	0	1.22	1	-0.34	-0.09	0	SIN3 homolog A, transcription regulator (yeast)
1392747_at		0.07	0.08	0	0.03	-1	-1.69	-0.27
1392818_at	Gas5	0	-0.05	0.03	0.05	-1.65	-1.22	0.26	growth arrest specific 5
1392973_at	Nav2	0	0.17	0.45	0.49	-0.08	-1.64	-1.65	neuron navigator 2
1393153_at		0.1	0.21	0	0	-1.48	-2.52	-0.91
1393202_a_at	Igf2bp3	0	0.19	0.04	0.01	-0.09	-1.51	-0.5	Insulin-like growth factor 2 mRNA binding protein 3
1393332_at	Gfod2	0.26	0.06	0	-0.35	-0.5	-1.07	0.4	glucose-fructose oxidoreductase domain containing 2
1393432_a_at	Dhx36	0.01	0	0.12	0.2	-0.49	-1.46	-0.69	DEAH (Asp-Glu-Ala-His) box polypeptide 36
1393613_at		0.06	-0.23	0.29	0.16	0	-1.48	-1.09
1394431_at	Cdadc1	0.25	0	0.38	0.18	-0.05	-1.22	-0.23	cytidine and dCMP deaminase domain containing 1
1394778_at		0	0.26	0.88	1.01	-1.94	-1.84	-0.27
1395480_at	Casc5	0.27	0	0.3	0.19	-0.07	-1.06	-0.76	cancer susceptibility candidate 5
1395686_at		0.19	0.06	-0.04	-0.14	0	-1.66	0.19
1395794_at	Tpm1	0.02	0	0.03	0.18	-1.53	-2.4	-1.63	tropomyosin 1, alpha
1396391_at		0.04	-0.19	0.14	0	-3.28	-0.91	0.65
1397409_s_at	Wee1	0	0.06	0.17	0.26	-1.12	-1.81	-0.68	wee 1 homolog (S. pombe)
1397952_at	Bbs12	0	0.46	0.36	0.16	-0.67	-1.61	-0.64	Bardet-Biedl syndrome 12
1398020_at	Mir23b	0.27	0	0.03	0.15	-1.14	-1.15	-0.62	microRNA mir-23b
1398508_at	Pqcp	0.39	0.43	0	0.21	-1.36	-1	-0.72	polyglutamine-containing protein
1398643_at	Dicer1	0.03	0	0.37	0.29	-1.45	-1.63	-0.76	dicer 1, ribonuclease type III

## Sheet: Table S4
Supplementary data Table S4
List of genes of cluster Down-II.
Probe Set ID	Gene Symbol	Expression levels (log2)							Gene Title
		Control	NaF (0 mM)			NaF (2 mM)
			3 h	6 h	12 h	3 h	6 h	12 h
1367632_at	Glul	0.09	-0.14	0.13	0.18	0	-0.38	-1.24	glutamate-ammonia ligase (glutamine synthetase)
1367652_at	Igfbp3	0.24	0	0.18	0.15	-0.17	-0.11	-1.17	insulin-like growth factor binding protein 3
1367667_at	Fdps	0.27	0.25	0.11	-0.02	0	-0.28	-1.16	farnesyl diphosphate synthase (farnesyl pyrophosphate synthetase, dimethylallyltranstransferase, geranyltranstransferase)
1367669_a_at	Map1lc3b	0.05	0	0.28	0.1	-0.51	-0.95	-1.81	microtubule-associated protein 1 light chain 3 beta
1367696_at	Ifitm2	0.08	0.06	0.16	0	-0.25	-0.3	-1.56	interferon induced transmembrane protein 2
1367744_at	Maged2	0.13	0	0.31	0.16	-0.03	-0.27	-1.37	melanoma antigen, family D, 2
1367763_at	Acat1	-0.14	0.17	0	0.11	0.06	-0.31	-1.51	acetyl-coenzyme A acetyltransferase 1
1367778_at	Furin	0.15	0	0.07	0.17	-0.07	-0.16	-1.19	furin (paired basic amino acid cleaving enzyme)
1367881_at	Sirpa	0.51	0	0.22	0.02	-0.13	-0.68	-1.38	signal-regulatory protein alpha
1367892_at	Pdk2	0	0.12	0.03	0.22	-0.19	-0.21	-1.41	pyruvate dehydrogenase kinase, isozyme 2
1367901_at	Gusb	0.25	0.26	0	0	0.02	-0.35	-1.24	glucuronidase, beta
1367932_at	Hmgcs1	0.01	0.06	-0.19	-0.31	0.33	0	-1.46	3-hydroxy-3-methylglutaryl-Coenzyme A synthase 1 (soluble)
1368156_at	Camkk1	0	0.15	0.5	0.75	-0.36	-0.84	-1.46	calcium/calmodulin-dependent protein kinase kinase 1, alpha
1368202_a_at	Dab2	0.41	0.06	0.05	-0.01	0	-0.37	-1.13	disabled homolog 2 (Drosophila)
1368248_at	Cds1	0.11	0.13	0.03	0	0	-0.11	-1.25	CDP-diacylglycerol synthase 1
1368320_at	Ncam1	0.08	0	0.04	-0.02	0.24	-0.07	-1.79	neural cell adhesion molecule 1
1368324_at	Brca2	0.24	-0.04	0.43	0.51	0	-1.01	-1.34	breast cancer 2
1368332_at	Gbp2	0.29	0.36	0.27	0	-0.12	-0.32	-1.63	guanylate binding protein 2
1368349_at	Fgfbp1	0.46	0.45	0	0.06	-0.23	-0.84	-1.3	fibroblast growth factor binding protein 1
1368426_at	Crot	0.2	0.12	0	-0.04	0.28	-0.3	-1.2	carnitine O-octanoyltransferase
1368463_at	Vegfc	0.11	0	0.05	0	-0.14	-0.57	-1.63	vascular endothelial growth factor C
1368674_at	Pygl	0.27	0	0	-0.1	-0.12	0.15	-1.15	phosphorylase, glycogen, liver
1368684_at	Fat2	0.05	-0.27	0.31	0.35	0	-0.69	-4.18	FAT tumor suppressor homolog 2 (Drosophila)
1368818_at	Psme4	0.35	-0.12	0.08	0	0.05	-0.8	-1.77	proteasome (prosome, macropain) activator subunit 4
1368835_at	Stat1 /// Stat4	0.03	0.1	0	0.17	-0.04	-0.45	-1.45	signal transducer and activator of transcription 1 /// signal transducer and activator of transcription 4
1368842_at		0	-0.05	0.07	-0.17	0.11	0.04	-1.65
1368869_at	Akap12	0.11	0	0.24	0.03	-0.43	-0.82	-1.9	A kinase (PRKA) anchor protein 12
1369018_at	Foxm1	0.27	0.26	-0.06	0.47	0	-0.52	-1.1	forkhead box M1
1369063_at	Anp32a	0.16	0.09	0	0.09	-0.11	-0.41	-1.61	acidic (leucine-rich) nuclear phosphoprotein 32 family, member A
1369096_at	Epha7	0.16	-0.39	0.25	0	0.23	-0.32	-1.36	Eph receptor A7
1369288_at	Pitx1	0.14	0.07	0	0.27	-0.41	-0.78	-1.25	paired-like homeodomain 1
1369499_at	Tyms	0.12	0.12	0.1	0	-0.14	-0.85	-2.37	thymidylate synthetase
1369679_a_at	Nfia	-0.05	0	0.16	0.11	0.75	-0.08	-1.64	nuclear factor I/A
1369928_at	Acta1	0.26	0	0.07	0.14	-0.01	-0.07	-1.57	actin, alpha 1, skeletal muscle
1370202_at	Pla2g16	0	0.05	0.15	0.37	-0.15	-0.08	-1.36	phospholipase A2, group XVI
1370227_at	Prl8a7	0	-0.22	0.09	-0.12	0.08	0.03	-1.38	prolactin family 8, subfamily a, member 7
1370442_at	Tmsbl1	0.07	0.05	0	-0.23	0.17	-0.26	-1.35	thymosin beta-like protein 1
1370513_at	Tpm1	0.26	0.07	0	0.42	-0.74	-0.94	-1.79	tropomyosin 1, alpha
1370693_a_at	Cnp	0.24	0.02	0.05	0	-0.27	-0.39	-1.32	2',3'-cyclic nucleotide 3' phosphodiesterase
1370802_at	Itgb5	-0.18	0.12	0	0.08	0.11	-0.4	-1.79	integrin, beta 5
1370811_at	Mpst	0.49	0	0.07	-0.08	0	0.16	-0.84	mercaptopyruvate sulfurtransferase
1370831_at	Mgll	0	-0.32	0.23	0.27	-0.01	0.14	-1.81	monoglyceride lipase
1370851_a_at	Kalrn	0.14	-0.52	0.05	0	-0.33	0.11	-1.3	kalirin, RhoGEF kinase
1370857_at	Acta2	0.69	-0.59	0.38	0	0.12	0	-1.38	smooth muscle alpha-actin
1370873_at	Calm3	0.34	0	0.06	0	-0.45	-0.92	-1.36	calmodulin 3
1370895_at	Col5a2	-0.03	0.05	0.23	0.22	0	-0.47	-1.77	collagen, type V, alpha 2
1370898_at	Snn	0.34	0	0.05	0.19	-0.56	-1	-1.8	stannin
1370942_at	Rasa3	0.08	0.1	-0.09	0	0.21	-0.03	-1.42	RAS p21 protein activator 3
1371031_at	Mat1a	0.1	0.35	0.08	0	-0.39	-0.25	-1.45	methionine adenosyltransferase I, alpha
1371133_a_at	Prkar2b	0.14	0	0.04	-0.14	0.07	-0.32	-1.42	protein kinase, cAMP dependent regulatory, type II beta
1371150_at	Ccnd1	0.24	0.16	0	-0.08	0.02	-0.37	-1.17	cyclin D1
1371173_a_at	Cast	0.38	-0.07	0.07	-0.49	0	0.02	-1.81	calpastatin
1371352_at	Hmgn2	0	0.11	0.17	0.38	-0.46	-1.13	-1.71	high mobility group nucleosomal binding domain 2
1371589_at	Ubl5	0.52	-0.01	0.3	0.3	-0.21	0	-1.09	ubiquitin-like 5
1371668_at	Rxra	0	0.19	0.26	0.27	-0.16	-1.01	-1.35	Retinoid X receptor alpha
1371694_at	Dpysl2	0.11	0.04	-0.09	0	0.08	-0.2	-1.41	dihydropyrimidinase-like 2
1371883_at	Mmd	0.29	0.46	0.06	0	-0.07	-1.12	-1.91	monocyte to macrophage differentiation-associated
1371935_at	Tmem9	0.11	0.02	0	0.15	-0.16	-0.29	-1.26	transmembrane protein 9
1371979_at	Srebf2	0.1	0.06	0	-0.16	0.04	-0.01	-1.32	sterol regulatory element binding transcription factor 2
1371986_at		0.13	0	0.2	0.2	-0.15	-1.25	-1.48
1372012_at	Dhcr24	0.14	0.31	0	-0.22	0.17	-0.4	-1.26	24-dehydrocholesterol reductase
1372031_at		0.11	0.08	0	0.06	-0.17	-0.52	-1.23
1372034_at	Parp14	0.21	0	0.09	0.06	-0.37	-1.03	-1.67	poly (ADP-ribose) polymerase family, member 14
1372038_at	Mknk2	0.02	0.11	0	0.16	-0.1	-0.52	-1.43	MAP kinase-interacting serine/threonine kinase 2
1372069_at	Kank1	-0.01	0	0.24	0.4	0.28	-0.63	-1.65	KN motif and ankyrin repeat domains 1
1372147_at	Ndufs4	-0.78	-0.26	0.61	0.34	0.02	0	-0.32	NADH dehydrogenase (ubiquinone) Fe-S protein 4
1372153_at	Krt15	0.27	0	0.82	1.61	-0.18	-0.29	-1.79	keratin 15
1372252_at	Trappc1	0.3	-0.03	0.37	0.12	0	-0.45	-1.08	trafficking protein particle complex 1
1372457_at	Mtus1	0.22	-0.04	0	0.12	0.01	-0.78	-1.14	mitochondrial tumor suppressor 1
1372572_at	Siat7F	0.94	-0.01	0.17	0	0.73	-0.24	-0.57	sialyltransferase 7F
1372574_at	Tead2	0.12	0.07	0.12	0	-0.15	-0.17	-1.22	TEA domain family member 2
1372757_at	Stat1 /// Stat4	-0.08	0.15	0.04	0	0.15	-0.87	-1.67	signal transducer and activator of transcription 1 /// signal transducer and activator of transcription 4
1372805_at		0	0.16	0.18	0	-0.17	-0.43	-1.47
1372816_at		0	-0.05	0.05	0.05	0.07	-0.64	-1.5
1372832_at		-0.02	-0.02	0.17	0.27	0.01	0	-1.42
1373005_at	Krtdap	0.04	0.08	0	0.04	-0.02	-0.11	-1.32	keratinocyte differentiation associated protein
1373092_at		0.17	-0.03	0	0.3	0.31	-0.87	-1.29
1373152_at	Prss23	0.02	0.19	0	-0.03	0.01	-0.22	-1.62	protease, serine, 23
1373154_at	RGD1563583	0.57	0.2	-0.32	0	-0.14	0	-0.76	Similar to mKIAA0998 protein
1373267_at	Sh3yl1	0.06	0.3	0.14	0	-0.1	-1.23	-1.83	SH3 domain containing, Ysc84-like 1 (S. cerevisiae)
1373337_at	Grhpr	0	0.15	0.18	0.25	-0.09	-0.49	-1.37	glyoxylate reductase/hydroxypyruvate reductase
1373415_at		0.13	0.16	0	0.15	-0.43	-0.69	-1.78
1373463_at	Col5a2	0.05	0.12	-0.13	0.14	0	-0.58	-2.17	collagen, type V, alpha 2
1373718_at	Tubb2a	0.04	-0.04	0.08	0	0.09	-0.27	-1.46	tubulin, beta 2a
1373924_at	Cpped1	0.27	0.11	0	0.39	-0.12	-0.4	-1.07	calcineurin-like phosphoesterase domain containing 1
1374038_at		0.16	0.33	-0.2	0	0.02	-0.43	-1.35
1374066_at	Cdc2l6	-0.03	0.09	0	0.32	0.18	-0.2	-1.61	cell division cycle 2-like 6 (CDK8-like)
1374200_at	Slc29a3	0.57	0.39	0	-0.09	0.25	-0.22	-1.02	solute carrier family 29 (nucleoside transporters), member 3
1374228_at	Trim47	0.45	0.38	0.04	0	-0.32	-1.36	-1.7	tripartite motif-containing 47
1374257_at	Tiam1	0.36	0	-0.09	-0.01	0.34	0.24	-0.99	T-cell lymphoma invasion and metastasis 1
1374329_at		0.25	-0.15	0.08	0.58	0	-1.1	-1.43
1374350_at		0	0.05	0.27	0.17	-0.13	-1.18	-2.3
1374368_at	Tmem164	0	0.16	-0.1	0.04	0.09	-1.05	-1.97	transmembrane protein 164
1374448_at	Reck	0.21	0.35	0.44	0	-0.03	-0.53	-1.7	reversion-inducing-cysteine-rich protein with kazal motifs
1374530_at	Fzd7	0.44	0.17	0.18	0	-0.56	-0.91	-1.21	Frizzled homolog 7 (Drosophila)
1374535_at	Afap1l2	0	0.25	0	0.12	-0.08	-0.68	-1.42	actin filament associated protein 1-like 2
1374551_at	Ifi35	0.31	0.29	0	0.06	-0.02	-0.84	-1.74	interferon-induced protein 35
1374611_at		0.03	0.17	0.29	0	-0.1	-0.58	-1.57
1374697_at	Plekhg5	0.35	0.56	0	0	0.42	-0.42	-1.37	pleckstrin homology domain containing, family G (with RhoGef domain) member 5
1374708_at	RGD1565043	0.14	0	0.14	0.12	-0.03	-0.25	-1.2	similar to Rho guanine nucleotide exchange factor (GEF) 10
1374718_at	Dtx3l	0	0	0.16	0.1	-0.59	-0.89	-1.35	deltex 3-like (Drosophila)
1374725_at	Mov10	0.34	-0.14	0.09	0.12	0	-0.3	-1.61	Moloney leukemia virus 10
1374771_at		0	0.01	0.05	0.1	-0.09	-0.7	-1.38
1374863_at	Rbp7	0	0	0.15	0.2	-0.18	-0.28	-1.77	retinol binding protein 7, cellular
1374889_at	Birc7	0.4	0.04	0	0.15	-0.29	-0.39	-1.03	baculoviral IAP repeat-containing 7
1374910_at	Celsr2	0.5	0.07	0.19	-0.24	0	-0.38	-0.94	cadherin, EGF LAG seven-pass G-type receptor 2 (flamingo homolog, Drosophila)
1374943_at	RGD1311378	0.27	0.71	0.07	-0.12	0	-0.13	-1.13	similar to RIKEN cDNA 2010011I20
1375173_at	Plbd2	0.09	0.19	-0.01	-0.02	0.2	0	-1.29	phospholipase B domain containing 2
1375377_at	Igsf3	0	-0.01	-0.01	0.26	0.53	0.05	-1.92	immunoglobulin superfamily, member 3
1375448_at	Opa3	0.39	0	-0.5	0.08	-1.08	0.39	-0.21	optic atrophy 3 (human)
1375493_at		0	0.14	0.16	0.09	-0.24	-0.84	-1.8
1375660_at	41525	0	0.06	0.33	0.22	-0.42	-0.11	-1.86	septin 8
1375729_at	Epha4	0.17	0	-0.01	0.36	0.65	-0.4	-1.4	Eph receptor A4
1375851_at	Klhl8	0.51	0.17	0.29	0	0	-0.58	-1.44	kelch-like 8 (Drosophila)
1375862_at	Pxdn	0.34	0	0.15	0.2	-0.14	-0.27	-1.11	peroxidasin homolog (Drosophila)
1375995_at	RGD1304592	0.39	0.03	-0.12	-0.37	0.03	0	-1.24	similar to KIAA0528 protein
1376194_at		0.01	-0.24	-0.06	0.33	0.98	0	-1.44
1376203_at		0.02	-0.51	0.04	0	0.08	-0.72	-1.38
1376231_at	Gins1	0.11	0	0.2	0.25	-0.19	-0.31	-1.57	GINS complex subunit 1 (Psf1 homolog)
1376465_at		0.01	0	0.14	0.23	-0.05	-0.37	-1.47
1376657_at	Cadm1	-0.12	0.05	-0.05	0	0.11	0.14	-2.37	cell adhesion molecule 1
1376693_at	RGD1563091	0.16	0.14	0.21	-0.22	0	-0.85	-2.12	similar to OEF2
1376708_at	Fam115c	0.13	-0.09	0.15	0.2	0	-0.04	-1.38	Family with sequence similarity 115, member C
1376719_at	Tmem38b	0	0.41	0.18	-0.03	0.01	-1.29	-1.96	transmembrane protein 38B
1376747_at		-0.01	0	-0.01	0.37	0.06	0.2	-1.87
1376768_at		-0.04	0.13	0.13	0.37	0	-0.05	-1.62
1376786_a_at	Neo1	0.25	0.04	-0.02	0	0.07	-0.36	-1.25	neogenin homolog 1 (chicken)
1376831_at	Fam64a	0	0.2	0.08	0.53	-0.21	-1.12	-2.36	family with sequence similarity 64, member A
1376920_at	LOC500013	0.53	0.06	0.25	-0.04	0	-0.4	-1.67	similar to sterile alpha motif domain containing 9-like
1377156_at	Tcf7l2	0.09	0	-0.05	0.16	0.02	-1.33	-1.98	transcription factor 7-like 2 (T-cell specific, HMG-box)
1377198_at		0.14	0	0.07	-0.1	0.12	-0.24	-1.31
1377356_at	Gdpd5	0.18	-0.03	0.22	0	0.24	-0.37	-1.47	glycerophosphodiester phosphodiesterase domain containing 5
1377375_at	Aass	-0.27	0	0.5	0.48	0.23	-0.27	-3.04	aminoadipate-semialdehyde synthase
1377753_at		0.2	0	0.23	0.35	-0.08	-0.46	-1.87
1379005_at	Arl6ip6	0.57	0.44	-0.08	0	0.66	-0.17	-0.85	ADP-ribosylation-like factor 6 interacting protein 6
1379252_at		0.07	0.03	0.01	-0.01	0	-0.34	-1.46
1379936_at		0.13	-0.39	0.1	0.15	0	-0.5	-1.3
1380517_at	Zmym3	0.12	0.08	0	0.16	-0.23	-0.13	-1.26	zinc finger, MYM-type 3
1382864_at	Palmd	0.12	0.07	0	0.47	-0.55	-0.8	-1.53	palmdelphin
1383912_at	LOC685045	-0.05	0.2	0.04	0.1	0	-0.51	-1.51	similar to Protein C6orf115
1385430_at	Lims1	1.62	0	0.82	-0.66	-0.67	0.01	-2.13	LIM and senescent cell antigen-like domains 1
1386881_at	Igfbp3	-0.1	0.17	0.31	0.2	0	-0.06	-1.53	insulin-like growth factor binding protein 3
1386904_a_at	Cyb5a	0	0.02	0.05	0.17	-0.22	-0.52	-1.34	cytochrome b5 type A (microsomal)
1386979_at	Serinc5	-0.36	0.01	0	0.01	0.06	-0.51	-2.24	serine incorporator 5
1387018_at	Sorbs2	-0.2	0.04	0.25	0.16	0	-0.42	-1.54	sorbin and SH3 domain containing 2
1387043_at	Lypd3	0.18	0.26	0	0.14	-0.6	-0.78	-1.32	Ly6/Plaur domain containing 3
1387057_at	Slc7a8	-0.04	0.11	0.07	0.12	-0.15	0	-1.53	solute carrier family 7 (cationic amino acid transporter, y+ system), member 8
1387100_at	Aqp3	0.01	-0.04	0.11	0.2	0	-0.24	-1.64	aquaporin 3
1387126_at	Atp2c1	0	0.02	-0.18	0.02	0.05	-0.47	-1.78	ATPase, Ca++ transporting, type 2C, member 1
1387172_a_at	Tgfb2	0.1	0	0.09	0.35	-0.06	-0.24	-1.37	transforming growth factor, beta 2
1387354_at	Stat1 /// Stat4	0	-0.23	0.04	0.13	0.04	-0.58	-1.52	signal transducer and activator of transcription 1 /// signal transducer and activator of transcription 4
1387357_at	Tmlhe	0	0.3	0.01	0.17	-0.51	-0.94	-1.44	trimethyllysine hydroxylase, epsilon
1387434_at	Slc22a4	0	0.01	-0.13	0.05	0.08	-0.4	-1.47	solute carrier family 22 (organic cation transporter), member 4
1387766_a_at	Rbp2	0.14	0	0.16	0.25	-0.16	-0.28	-1.82	retinol binding protein 2, cellular
1387897_at	Cnp	0.17	0.19	0.02	0	-0.05	-0.42	-1.25	2',3'-cyclic nucleotide 3' phosphodiesterase
1387905_at	Dnajc12	0.08	0.03	0.09	0	-0.62	-0.66	-1.29	DnaJ (Hsp40) homolog, subfamily C, member 12
1387946_at	Lgals3bp	0	0.22	0.22	-0.01	0.16	-0.71	-1.41	lectin, galactoside-binding, soluble, 3 binding protein
1388015_at	Ptprz1	0.53	0	-0.2	-0.32	0.34	0.06	-1.48	protein tyrosine phosphatase, receptor-type, Z polypeptide 1
1388104_at	Lgr4	0.04	-0.32	0.35	0.53	0	-0.68	-1.61	leucine-rich repeat-containing G protein-coupled receptor 4
1388108_at	Elovl6	0.36	-0.16	0.35	0.26	0	-0.64	-1	ELOVL family member 6, elongation of long chain fatty acids (yeast)
1388112_at	Slc25a4	0.15	0.05	0.06	0	-0.06	-0.29	-1.28	solute carrier family 25 (mitochondrial carrier; adenine nucleotide translocator), member 4
1388337_at	Np	0.24	0	0.08	0.06	-0.16	-0.1	-1.09	nucleoside phosphorylase
1388356_at	S100a16	0.14	0	0.11	0.2	-0.28	-0.59	-1.4	S100 calcium binding protein A16
1388525_at	Pik3ip1	0.48	-0.05	0.36	0.41	0	-0.72	-1.59	phosphoinositide-3-kinase interacting protein 1
1388662_at		0.71	0	-0.02	0.24	0.23	-0.49	-0.85
1388781_at		-0.01	0.11	0.54	0.46	0	-0.15	-1.43
1388827_at	LOC685909	0.1	0	0.02	0.2	-0.13	-0.19	-1.45	similar to H2A histone family, member V isoform 1
1388884_at	RGD1310224	0.03	0.1	0	0	-0.08	-0.32	-1.65	similar to RIKEN cDNA 1810022C23
1388930_at	Tmem123	0	0.07	0.05	0.09	-0.17	-0.58	-1.36	transmembrane protein 123
1388955_at	Ehd2	0.02	0.15	0	0.06	-0.09	-0.39	-1.55	EH-domain containing 2
1388972_at	Rtn4r	0.01	0.06	-0.17	0.05	0	-0.52	-1.44	reticulon 4 receptor
1389085_at		0.11	0.37	-0.01	0.08	0	-0.46	-1.49
1389115_at	Evpl	0.15	0.19	0	0.26	-0.14	-0.63	-1.35	envoplakin
1389137_at	Cit	0.09	0	-0.01	0.27	0.31	-0.46	-1.35	Citron
1389229_at	Acpl2	0.1	0.13	0.29	0	-0.27	-1.24	-1.84	acid phosphatase-like 2
1389659_at	Ctla2a	0.25	0.11	0	0.21	-0.07	-0.49	-1.11	cytotoxic T lymphocyte-associated protein 2 alpha
1389665_at	Habp4	0.25	0.31	0.23	0	-0.42	-0.97	-1.17	Hyaluronan binding protein 4
1389668_at	Spc25	0	0	0.14	0.23	-0.09	-0.61	-1.55	SPC25, NDC80 kinetochore complex component, homolog (S. cerevisiae)
1389759_at	Celsr1	0.08	-0.52	0.1	0.31	0	-0.39	-1.67	Cadherin, EGF LAG seven-pass G-type receptor 1 (flamingo homolog, Drosophila)
1389873_at	Pycard	0	0.13	0.02	0.07	-0.27	-0.94	-2.93	PYD and CARD domain containing
1389883_at	RGD1563224	0.09	0.04	0	0.04	-0.11	-0.3	-1.44	similar to 4930438D12Rik protein
1389885_at	Limd2	-0.01	-0.13	0.17	0.19	0.01	0	-1.47	LIM domain containing 2
1389918_at	LOC100360205	0.08	0	0.11	-0.02	0.24	-0.04	-1.77	palladin
1390117_at		0	-0.34	0.08	0.39	0.34	-0.7	-1.5
1390156_a_at	Prickle2	-0.63	0.52	0	0.33	0.84	-0.04	-1.91	prickle homolog 2 (Drosophila)
1390400_a_at		-0.12	0.02	0.19	0.02	0	-0.33	-1.58
1390426_at	Notch1	0.19	0.07	0	0.15	-0.11	-0.37	-1.21	Notch homolog 1, translocation-associated (Drosophila)
1390437_at	Sema5a	0.35	-0.01	0	-0.06	0.4	0.08	-1.61	sema domain, seven thrombospondin repeats (type 1 and type 1-like), (semaphorin) 5A
1390449_at		-0.07	0.16	0	0.11	0.05	-0.83	-1.76
1390471_at		0.27	-0.29	0.12	0	0.32	-0.48	-1.27
1390638_at	Epha4	0	-0.13	0.14	0.16	0.65	-0.48	-1.61	Eph receptor A4
1390711_at		-0.16	0	0	0.09	0.01	-1.29	-1.54
1391518_at	LOC689399	0.44	0	-0.05	0.27	0.23	-0.24	-0.97	hypothetical protein LOC689399
1391616_at		0.76	0.08	0.09	0	-0.47	-0.48	-0.72
1392941_at	Hip1	0.11	0.08	0.03	-0.11	0	-0.49	-1.23	huntingtin interacting protein 1
1394118_at	Ate1	-0.78	0.52	0.56	-0.6	0.97	0	-0.19	Arginine-tRNA-protein transferase 1
1394120_a_at		0.41	0	0.27	0.37	-0.03	-0.07	-1.23
1398335_at	Ttyh3	0.08	0.34	0.09	0	-0.1	-0.62	-2.01	tweety homolog 3 (Drosophila)
1398358_a_at	Itgb5	0.25	0	0.1	0.09	-0.08	-0.12	-1.45	integrin, beta 5
1398387_at	Fam198b	-0.01	0.14	0.08	0	0	-0.28	-1.83	family with sequence similarity 198, member B
1398840_at	Vamp5	0	0.15	0.12	0.16	-0.47	-1.16	-1.48	vesicle-associated membrane protein 5
1377636_at		0.29	-0.27	0	-0.05	0.18	0.43	-1.03
1377660_at	RGD1309350	0.28	-0.21	0.35	-0.45	0.31	0	-1.1	similar to transthyretin (4L369)
1377662_at	Pir	0.21	0.09	-0.06	0	0.08	-0.45	-1.23	pirin (iron-binding nuclear protein)
1377679_at		0.22	-0.21	0.35	0.29	0	-0.06	-2.15
1377687_at	Zc4h2	0.2	0.11	-0.01	0.15	0	-0.33	-1.37	zinc finger, C4H2 domain containing
1377725_at		0	0.16	0.12	0.33	-0.14	-1.23	-1.73
1377739_at	Gng12	0.12	0.12	0	0.04	-0.09	-0.66	-1.31	guanine nucleotide binding protein (G protein), gamma 12
1377775_at		0.06	0	0.44	0.57	-0.02	-0.64	-1.81
1377826_at		0	0.13	0.16	-0.12	0	-0.49	-1.52
1377868_at	Gprasp2	0.12	-0.29	0.19	0.05	0	-0.86	-1.79	G protein-coupled receptor associated sorting protein 2
1377879_at		0.16	0.23	0	0	0.02	-0.98	-1.76
1377940_at	Fam101b	0.15	0.11	0	0.1	-0.02	-0.43	-1.55	family with sequence similarity 101, member B
1378056_at	Gmnn	0.12	0.07	0	0.02	-0.35	-1.15	-1.43	geminin
1378168_at	Fam101b	0.26	0.15	0.16	0	-0.19	-0.43	-1.61	family with sequence similarity 101, member B
1378397_at		-0.14	0	0.05	0.27	0.53	-0.43	-1.71
1378640_at	Uhrf1	0.35	0.08	0.07	-0.09	0	-0.19	-1.04	ubiquitin-like with PHD and ring finger domains 1
1378997_at	Ephb6	-0.06	0	0.12	0.58	0.11	-0.21	-1.82	Eph receptor B6
1379130_at		0.29	0.04	0.13	-0.01	0	-0.54	-1.25
1379382_at		0.05	0	0.16	0.15	-0.28	-0.59	-1.65
1379423_at	Rsu1	0.46	0.2	-0.15	0	0.16	-0.51	-1.17	Ras suppressor protein 1
1379631_at	Csf1	0.83	0.47	0.36	0	-0.09	-0.61	-1.27	colony stimulating factor 1 (macrophage)
1379656_a_at		0.2	0.04	0.02	-0.02	0	-0.61	-1.36
1379669_at		0.17	0	-0.2	0.14	0.14	-0.59	-1.3
1379693_at	Robo2	0	-0.38	-0.14	0.11	0.07	0.03	-1.43	roundabout, axon guidance receptor, homolog 2 (Drosophila)
1379935_at	Ccl7	0.59	0.53	0.34	0	-0.51	-0.69	-1.43	chemokine (C-C motif) ligand 7
1379970_at	Epha4	0	-0.78	-0.15	0.09	0.59	0.31	-1.32	Eph receptor A4
1380182_at	RGD1563437	0	0.07	-0.04	0.22	0.02	-0.3	-1.47	Similar to KIAA1217
1380217_at	Ndc80	0.44	0.22	0	0.34	-0.43	-0.8	-1.19	NDC80 homolog, kinetochore complex component (S. cerevisiae)
1380410_at		0.3	0.31	0.15	0	-0.3	-0.57	-1.98
1380682_at	Mex3b	0.01	0.1	0.05	0	-0.64	-1.1	-1.5	mex3 homolog B (C. elegans)
1380695_at		0.64	0.35	0.05	-0.44	0	-0.55	-1
1380960_at	Coro2a	0	0.21	0.03	0.12	-0.13	-0.76	-1.34	coronin, actin binding protein 2A
1381079_at	Bnc1	0.58	0.58	0	0.38	-0.34	-0.96	-1.26	basonuclin 1
1381081_at		0.23	0.05	-0.02	0	0.03	-0.77	-1.22
1381126_at	Srgap2	0.62	0.23	-0.79	0	-0.57	0.22	-0.26	SLIT-ROBO Rho GTPase activating protein 2
1381288_at	Il1f5	0.24	0.14	0	0.18	-0.22	-0.97	-1.64	interleukin 1 family, member 5 (delta)
1381537_at	Klc3	-0.12	-0.4	0.38	0.13	0	0.02	-1.53	kinesin light chain 3
1381705_at		0.77	-0.64	0.49	0.35	-0.05	-0.29	0
1381871_at		-0.06	0	-0.16	0.18	0.09	0.29	-1.71
1382010_at	Tmem107	0.43	0	0.06	0.16	-0.18	-0.55	-1.34	transmembrane protein 107
1382143_at	Farp1	0.46	-0.01	0.11	0	0.18	-0.56	-1.19	FERM, RhoGEF (Arhgef) and pleckstrin domain protein 1 (chondrocyte-derived)
1382177_at		0.14	0	0.23	0.29	-0.39	-0.8	-1.26
1382183_at		0	0.12	0.24	0.22	-0.12	-0.42	-1.57
1382451_at	Hebp2	0.14	0.21	-0.03	0.13	0	-0.93	-2.17	heme binding protein 2
1382467_at	Bex1 /// Bex2	0.28	0	0	0.05	0.13	-0.08	-1.23	brain expressed gene 1 /// brain expressed X-linked 2
1382658_at	LOC100364718	0.34	-0.92	0.04	0.03	0	-0.5	-0.98	myeloid/lymphoid or mixed-lineage leukemia 3-like
1382863_at		0.23	0.26	0	0.09	-0.12	-0.23	-1.83
1382896_at		0.08	0.1	-0.03	0	0.12	-0.31	-1.26
1382924_at	Pank1	0	0.42	0.06	0.08	-0.21	-1.35	-1.51	pantothenate kinase 1
1383284_at		-0.04	0.13	0	0.17	0.32	-0.16	-2.22
1383298_at	RGD1310444	0.19	0	0.23	0.43	-0.05	-0.68	-1.25	LOC363015
1383300_at	Klhl24	0.52	0	-0.12	-0.08	0.14	0.06	-0.96	kelch-like 24 (Drosophila)
1383326_a_at	Pdcd4	-0.02	0.11	0	0.01	0.13	-0.82	-1.59	programmed cell death 4
1383327_at	Pdcd4	0.41	0	0.31	0.43	-0.01	-0.37	-0.99	programmed cell death 4
1383328_x_at	Pdcd4	0.15	-0.28	0	0.14	0.03	-0.86	-1.64	programmed cell death 4
1383404_at		0.02	0.18	-0.09	0	0.32	-0.06	-2.16
1383433_at	Klhl23	0	0.09	0.16	0	-0.22	-0.92	-1.8	kelch-like 23 (Drosophila)
1383498_at		0.11	-0.06	0	-0.01	0.17	0.05	-1.45
1383689_at	B4galt4	0.22	-0.1	0.17	0	0.52	-0.17	-1.59	UDP-Gal:betaGlcNAc beta 1,4-galactosyltransferase, polypeptide 4
1383749_at	Phospho1	0.25	-0.11	0	0.59	0.06	0	-1.26	phosphatase, orphan 1
1383989_at	Sox4	0.56	-0.13	0.38	0.62	-0.02	0	-0.86	SRY (sex determining region Y)-box 4
1384043_at		0.75	0.25	0.45	0	-0.19	-0.78	-0.76
1384144_at	Nxn	0.19	0	0.02	-0.14	0.14	-0.11	-1.79	Nucleoredoxin
1384206_at	Sdr16c5	0.29	0	0.42	0.55	-0.1	-1.08	-2.74	short chain dehydrogenase/reductase family 16C, member 5
1384239_at	Tbc1d8	0.1	0.1	0	0.25	-0.16	-0.27	-1.32	TBC1 domain family, member 8
1384408_at		0	0.44	0.06	0.34	-0.07	-0.97	-1.63
1384469_at	Abca5	-0.25	0	0	0.25	-0.29	0.23	-2.05	ATP-binding cassette, sub-family A (ABC1), member 5
1384707_at	Scara5	-0.08	0.09	0	0.18	0.26	-0.39	-1.57	scavenger receptor class A, member 5 (putative)
1384752_at	LOC689770	0.36	0.14	0.13	-0.16	0	-0.09	-1.27	similar to osteoclast inhibitory lectin
1384812_at		0	0	-0.18	0.17	0.44	-0.09	-2.39
1384939_at	Il18r1	-0.04	0.03	0.38	0	0.15	-0.53	-1.42	interleukin 18 receptor 1
1385006_at		0.69	0	0	-0.17	0.4	-0.01	-0.67
1385014_at	Nudt11	0.09	-0.05	0	0.04	0.05	-0.44	-1.58	Nudix (nucleoside diphosphate linked moiety X)-type motif 11
1385027_at		0.02	0.01	-0.05	0	0.04	-0.17	-1.46
1385155_at	Lrrfip1	0.87	0	0.36	-0.35	-0.12	0.23	-0.55	leucine rich repeat (in FLII) interacting protein 1
1385190_at		0.14	0	0	0.31	-0.35	-0.49	-1.39
1385274_at	Pcdhb19	-0.03	0.13	0.07	0.36	0	-0.86	-3.09	protocadherin beta 19
1385608_at		0.05	0.06	0	0.08	-0.05	-1.03	-2.14
1385701_at		0.02	0	0.19	0.36	-0.12	-0.79	-1.54
1385759_at	Serpinb10	0.22	0.15	0.05	-0.08	0	-0.82	-2.6	serine (or cysteine) peptidase inhibitor, clade B (ovalbumin), member 10
1385925_at		0.17	0	0.11	0.03	-0.52	-0.42	-1.67
1385974_at	Pard6g	0.29	-0.06	0	0.27	0.01	-0.45	-1.84	par-6 partitioning defective 6 homolog gamma (C. elegans)
1386027_at	Rp2	0	0.32	0	0.13	0.08	-0.43	-2.13	retinitis pigmentosa 2 homolog (human)
1386145_at		0	0.2	0.21	0	0.04	-0.29	-1.65
1390802_at	RGD1306839	0.08	0	0.09	0.11	-0.38	-1.05	-2.03	similar to RIKEN cDNA 5033414D02
1390821_at	Pcdha1 /// Pcdha10 /// Pcdha11 /// Pcdha12 /// Pcdha13 /// Pcdha2 /// Pcdha3 /// Pcdha4 /// Pcdha5 /// Pcdha6 /// Pcdha7 /// Pcdha8 /// Pcdha9 /// Pcdhac1 /// Pcdhac2	-0.03	0.03	0.11	0	0.26	-0.03	-1.78	protocadherin alpha 1 /// protocadherin alpha 10
1390915_at	Morc4	0.21	0	-0.19	0.1	0.09	-0.38	-1.28	MORC family CW-type zinc finger 4
1390925_a_at	Igsf3	0.21	-0.06	0	0.07	0.03	-0.07	-1.53	immunoglobulin superfamily, member 3
1390976_at	Lynx1	0.5	-0.06	-0.15	0.01	0.08	0	-0.95	Ly6/neurotoxin 1
1391576_at		0.19	0	0.11	-0.43	0.62	-0.18	-1.48
1391635_at	Ctdspl	0.46	0	0.45	0.32	0	-0.68	-1.18	CTD (carboxy-terminal domain, RNA polymerase II, polypeptide A) small phosphatase-like
1391841_at		0.06	-0.19	0	0.17	0.05	-0.32	-1.27
1391885_at		0.33	0.51	0	0.06	-0.17	-0.27	-1.18
1391948_at	Bcl11b	0.32	0	0.27	0.46	-0.17	-0.9	-1.41	B-cell CLL/lymphoma 11B (zinc finger protein)
1392012_at	LOC686567	0.15	0.04	0.12	0	-0.33	-1.01	-1.3	similar to Epiplakin
1392044_at		0.14	-0.2	0	0.02	0.42	-0.18	-1.39
1392064_at	Dlx1	0	0.34	0.02	0.11	-0.37	-1.05	-1.88	distal-less homeobox 1
1392077_at	Mpped2	0	0.03	-0.14	0.06	0.15	-0.39	-1.43	metallophosphoesterase domain containing 2
1392301_at	Sh3tc1	0	0.33	0.01	0.08	-0.25	-1.23	-1.43	SH3 domain and tetratricopeptide repeats 1
1392382_at	Tgfb2	0.2	-0.01	0.54	0.5	0	-0.26	-1.64	Transforming growth factor, beta 2
1392667_at		0.32	0	0.22	0	0.33	-0.53	-1.51
1392927_at	Paqr4	-0.01	0.19	0.03	0	0.01	-0.18	-1.69	progestin and adipoQ receptor family member IV
1393000_at		0	0.04	-0.11	0.07	0.27	-0.11	-1.33
1393144_at	Nmi	0.13	0.15	0.23	0	-0.12	-0.17	-1.52	N-myc (and STAT) interactor
1393615_at		0.45	0.3	0.15	-0.44	0	-0.15	-1.49
1393832_at	Rbm43	0.2	0.32	0.14	0	-0.56	-1.44	-2.13	RNA binding motif protein 43
1394022_at	Id4	0.41	0.32	0.09	-0.2	0	-1.4	-1.41	inhibitor of DNA binding 4
1394107_at	Tbl1xr1	0	0.09	-0.06	0.08	0.12	-0.44	-1.56	transducin (beta)-like 1 X-linked receptor 1
1394109_at		0.19	-0.08	0.15	0.11	0	-0.37	-1.59
1394387_at	Ccdc34	0	0.2	0.2	0.24	-0.16	-0.72	-1.93	coiled-coil domain containing 34
1394408_at	RGD1563692	0.24	0.36	0.37	0	-0.01	-0.69	-1.19	similar to hypothetical protein FLJ22671
1394430_at		0.17	0	0.11	0.01	-0.06	-0.72	-1.31
1394702_at		0.08	0	-0.19	0.13	0.23	-0.69	-1.64
1394706_at		0.69	0	0.37	0.27	-0.25	-0.96	-1.03
1394761_at	Arhgap42	0.06	0.09	-0.2	0	0.48	-0.42	-1.33	Rho GTPase activating protein 42
1394819_at	Sp110	-0.17	0.01	0.23	0	0.05	-0.45	-1.5	SP110 nuclear body protein
1394874_at		-0.09	0.09	0.05	0	0.2	-0.43	-1.9
1394954_at	Slc31a2	0.41	0	0.24	0.27	-0.52	-0.44	-1.03	solute carrier family 31 (copper transporters), member 2
1394999_at	RGD1562617	0.12	0	0.74	0.74	-0.05	-0.35	-1.36	similar to RAB7-like protein
1395166_at	Ehd2	0.11	0	0.1	0.11	-0.34	-0.49	-1.27	EH-domain containing 2
1395211_s_at		0.09	0	0.01	-0.3	0.4	-0.42	-1.6
1395316_at	Mageh1	0	0.19	0.16	-0.05	0.12	-0.61	-1.62	melanoma antigen, family H, 1
1395323_x_at		-0.65	0	0.76	0.39	0.79	-0.62	0
1395652_at	Gyltl1b	0.23	0.4	0	0.02	-0.2	-1.08	-1.22	glycosyltransferase-like 1B
1396000_at		0.11	0.05	0	0.1	-0.02	-0.66	-1.46
1396126_at		0.26	0.17	0.03	-0.02	0	-0.34	-1.17
1396820_at	Hdac1	0.12	-1.37	0	0.03	-0.29	0.17	-0.37	histone deacetylase 1
1397097_x_at		0.85	-0.54	0.4	-0.02	0.73	-0.14	0
1397304_at	Igtp	0	0.02	0.29	0.04	-0.49	-1.91	-2.63	interferon gamma induced GTPase
1397423_at		-0.6	0.29	-0.26	0	0.28	0.77	-0.59
1397476_at	Ttk	0.79	0	0.14	-0.21	0.04	-0.61	-1.26	Ttk protein kinase
1397609_at	Traf4af1	0.59	-0.48	0.36	0.65	0	-0.77	-0.57	TRAF4 associated factor 1
1397630_at		0	-0.17	0.38	0.33	0.34	-0.16	-2.14
1397758_at	Gnptab	0.38	0.28	0	0.25	-0.12	-0.86	-1.15	N-acetylglucosamine-1-phosphate transferase, alpha and beta subunits
1397769_at		0.34	0	0.45	0.4	-0.06	-0.85	-1.38
1398016_at	Scd	1.07	0.3	-0.54	0	-0.85	0.42	-1.15	stearoyl-CoA desaturase (delta-9-desaturase)
1398521_at		0.23	0	-0.08	0.25	0.26	-0.39	-1.34

## Sheet: Table S5
Supplementary data Table S5
Nucleotide sequences of primers and TaqMan probes for target genes.
genes	orientation	Nucleotide sequence (5' to 3')	Position	GenBank accession No.
Atf3	Sense	CGAGCGAAGACTGGAGCAAA	138-157	BC078903
	Antisense	AGGTGCTTGTTCTGGATGGC	318-299
Atf4	Sense	TTGGCCACGTTGGATGACAC	373-392	NM_024403
	Antisense	ACAGGGAAGAGGCTGCAAGA	531-512
Ddit3	Sense	CTCTCCAGATTCCAGTCA	406-423	NM_001109986
	Antisense	TTCCGTTTCCTAGTTCTTC	480-462
	Probe	FAMTM-ATCTTCCTCTTCTTCCTCCTGAGC-TAMRATM	457-480
Fos	Sense	GGGGCAAAGTAGAGCAGCTATC	529-550	NM_022197
	Antisense	CTGCAACGCAGACTTCTCGT	692-673
Gapdh	Sense	CCTACCCCCAATGTATCCGT	775-794	NM_017008
	Antisense	CATGTAGGCCATGAGGTCCA	1062-1043
Hspa5	Sense	GTACCAGCTTACTTCAATG	695-713	NM_013083
	Antisense	TCCTCATGACATTCAGTC	773-756
	Probe	FAMTM-CACAGCGGCAAGCAACCAAG-TAMRATM	717-736

## Sheet: Table S6
Supplementary data Table S6
Nucleotide sequences of siRNAs.
Genes	Sequence-TT	Position	GenBank accession No.
Rat Ddit3	CCAGGGAGGUAGAGACCAC	609-627	NM_001109986
Rat Hspa5	UCAAGUUCUUGCCAUUCAA	516-534	NM_013083
Human Ddit3	GGUCCUGUCUUCAGAUGAA	418-436	NM_001195053
Human Hspa5	UGAAGCCCGUCCAGAAAGU	1277-1295	NM_005347
Firefly luciferase	CGUACGCGGAAUACUUCGA	155-173	AB644228
